# Supplementary material for: Capturing differences in perception and aesthetic judgment of live or medially presented music: development of a self-report instrument
Source: Front Psychol. 2024 Apr 2;15:1339168. doi: 10.3389/fpsyg.2024.1339168 (PMC11018976; doi:10.3389/fpsyg.2024.1339168)
Supplement: Supplementary file 1 [file Table_1.XLSX]

## Sheet: P 1
Stimulus	klingt räumlicher - Mono	Im Kopf-Lokalisation - Externalisiert	Räumlicher (Klang der Musiker) - nicht-räumlich	Kein Hall - mit Hall	Einzelne Quelle (z.B. Instrument) dreht sich mit Kopfbeweung mit - Gesamtklang konsistent (alle Quellen verhalten sich gleich)	Nasal - breitbanding	leise - laut	Klingt nach Stereo - klingt nach 3D Sound (wie mehrere Lautsprecher	Unvolle Klangfarbe - voller Klang	Direkter Klang - umgebender Klang	Zu hören und zu sehen: Musiker spielen in einem Raum - Zu hören und zu sehen: Aufnahme kommst aus Lautsprecher	Bild: Konzertbühne - Lautsprecher statt Konzertbühne
Lodi_Real_vorn	-2	3	-2	2	3	3	2	2	2	2	-3	-3
Lodi_Real_hinten	-3	3	-2	3	3	2	-2	3	2	2	-3	-3
Lodi_Real_vorn_MTB	-3	3	-2	3	3	3	2	2	3	2	-3	-3
Lodi_Real_hinten_MTB	-2	3	-2	2	3	1	-2	1	1	1	-3	-3
Lodi_Mono	3	3	-3	2	3	-3	1	0	-3	-3	3	3
Lodi_AB	-2	3	-2	2	3	1	1	2	1	1	0	3
Lodi_XY	1	3	2	2	3	0	-1	-2	0	-1	3	3
Lodi_ORTF	-1	3	-2	2	3	0	0	1	-1	0	1	3
Lodi_DeccaS	-1	3	0	2	3	1	1	-2	1	1	1	3
Lodi_INA3S	-1	3	0	1	3	-2	1	-2	-2	-1	3	3
Lodi_AB_KH	1	-3	2	1	3	-2	0	-3	-2	-2	0	3
Lodi_XY_KH	1	-3	3	1	3	-2	-1	-3	-3	-2	0	3
Lodi_WFS_A	-1	3	-1	1	3	-2	-2	2	-2	0	1	3
Lodi_WFS_B	0	3	-1	1	-3	-2	-1	2	-2	0	3	3
Chant_Real_vorn	-3	3	-3	3	3	3	2	3	3	2	-3	-3
Chant_Real_hinten	-2	3	-3	2	3	3	-3	3	2	2	-3	-3
Chant_Real_vorn_MTB	-1	3	-2	2	3	0	2	-1	-1	-1	-2	-3
Chant_Real_hinten_MTB	-2	3	-3	2	3	2	-2	1	2	1	-2	-3
Chant_Mono	2	3	1	2	3	-2	1	0	-1	-3	3	3
Chant_AB	1	3	-1	2	3	-1	1	-2	-1	-1	0	3
Chant_XY	0	3	2	-2	3	0	0	-1	0	-1	3	3
Chant_ORTF	0	3	2	1	3	-2	1	-1	-3	-2	3	3
Chant_DeccaS	-1	3	-2	2	3	0	0	1	0	-1	1	3
Chant_INA3S	-1	3	1	1	3	-1	2	-2	-2	-1	2	3
Chant_AB_KH	1	-3	2	-2	3	-1	-1	-3	-2	-2	3	3
Chant_XY_KH	0	-3	3	1	3	-1	1	-3	-2	-2	0	3
Chant_WFS_A	-1	3	-1	1	3	-2	-1	0	-3	-2	2	3
Chant_WFS_B	-2	3	0	1	-3	-3	0	1	-1	-2	1	3
Lodi_Real_vorn_REL	-2	3	-3	3	3	2	2	3	3	3	-3	-3
Lodi_AB_REL	1	3	2	1	3	-1	0	-1	-1	-1	3	3
Chant_Real_vorn_REL	-1	3	-1	3	3	1	2	2	2	2	-3	-3
Chant_XY_REL	-1	3	-1	1	3	-1	1	-1	-1	-1	0	3

## Sheet: P 2
Stimulus	Lauter - leiser	Zu leise. Höranstrengung steigt - angemessen laut	Bearbeitet - natürlich	Klangzentriert (kommt alles aus einer Richtung) - Klangpanorama (kommt hörbar aus versch. Richtungen)	Steril (Klang) - natürliche Umgebungsgeräusche	Tiefpassgefiltert - spektral vollständig - ausgeglichen	Solistin präsent in Vordergrund (akustisch) - Ensemblespiel	Symbiotisches Klanggefüge - einzelne Stimmen gut raushörbar	Mehr Bassanteil - weniger Bassanteil	Klang von vorn - Klang umgebend, umhüllt	Klang dünn - Klang voll	Direkter, umittelbarer Klang - indirekter Klang	Komprimierte Dynamik des Klangs - natürliche Dynamik des Klangs	Blechern, schrill (vor allem die Sängerin) - nicht blechern, nicht schrill	Bilddramaturgie weckt dann nicht erfüllte Erwartungen - ohne Bilddramaturgie keine Erwartungen	Aufmerksamkeit ungelenkt - Bild lenkt Aufmerksamkeit des Hörens	Langweilig - klanglich reizvoll	Privat. Sofagefühl (Allg. Zustand) - öffentlich (Allg. Zustand)	Livepräsentation - Bildschirmpräsentation	Klang/Bild weiter entfernt - Klang/Bild dicht	Klangquellenort: Bild/Ton übereinstimmend erwt.gm - Klangquellenort: Bild/Ton auseinander tlw. Irritierender	Interaktionen des Ensembles nicht sichtbar - Interaktionen des Ensembles sichtbar	Helles Tageslicht (Live-Bühne) - warmes Lampenlicht (Video-Bühne)
Lodi_Real_vorn	0	3	2	3	2	3	3	-3	-2	1	3	-3	3	3	3	-3	3	3	-3	3	-3	3	-3
Lodi_Real_hinten	3	-3	2	-2	2	2	3	-2	-3	-2	3	1	2	3	3	-3	1	3	-3	-3	-3	-3	-3
Lodi_Real_vorn_MTB	-2	3	3	2	2	3	3	-3	-3	-2	3	-3	3	3	3	-3	3	3	-3	3	-3	3	-3
Lodi_Real_hinten_MTB	2	1	3	1	2	3	0	-2	-1	-1	1	-2	2	3	3	-3	2	3	-3	-1	-3	-2	-3
Lodi_Mono	0	2	0	2	1	3	3	-1	-2	1	3	-1	2	3	3	3	2	-3	3	2	3	3	3
Lodi_AB	-1	3	-1	1	1	3	3	1	-2	1	2	-1	1	3	3	3	3	-3	3	2	3	3	3
Lodi_XY	-2	3	-3	1	1	0	3	0	0	1	1	2	-2	-1	3	3	1	-3	3	2	2	3	3
Lodi_ORTF	1	3	1	0	1	2	3	0	0	1	1	-1	2	3	3	3	2	-3	3	2	3	3	3
Lodi_DeccaS	-1	3	-1	1	-1	-2	3	1	-2	1	2	1	0	3	3	3	1	-3	3	2	3	3	3
Lodi_INA3S	0	3	-1	-1	-2	3	3	2	-1	1	1	2	-2	2	0	3	2	-3	3	2	3	3	3
Lodi_AB_KH	-1	3	1	-1	-1	1	3	1	0	1	1	1	2	0	3	3	3	-3	3	2	2	3	3
Lodi_XY_KH	-1	2	-1	-1	-3	-1	3	2	0	-1	-1	1	1	3	0	3	2	-3	3	3	3	3	3
Lodi_WFS_A	1	2	-1	2	1	3	3	0	-1	1	2	0	2	2	3	3	3	-3	3	1	3	3	3
Lodi_WFS_B	-2	2	3	1	1	3	3	2	-1	1	2	-2	3	3	0	3	2	-2	3	3	1	3	3
Chant_Real_vorn	-1	2	2	1	1	1	2	-2	1	1	1	-2	2	1	3	-3	2	3	-3	2	-3	3	-3
Chant_Real_hinten	2	-1	2	-1	1	2	1	-1	1	-2	-1	1	-1	3	3	-3	-1	3	-3	-3	-3	-3	-3
Chant_Real_vorn_MTB	-2	3	2	2	1	3	1	-1	-1	1	2	-3	3	2	3	-3	2	3	-3	3	-3	3	-3
Chant_Real_hinten_MTB	3	-3	1	-1	3	3	3	-2	-1	-2	1	-2	2	3	3	-3	0	3	-3	-3	-3	-3	-3
Chant_Mono	-2	3	-2	1	-1	0	-2	1	1	1	-1	1	-1	-3	-3	3	1	-3	3	3	3	3	3
Chant_AB	1	3	1	1	-1	1	-1	0	-1	1	1	-1	2	-1	-3	3	2	-2	3	3	1	3	2
Chant_XY	-1	3	-1	-1	-1	1	-1	1	1	0	-1	1	1	3	3	3	1	-3	3	2	3	3	3
Chant_ORTF	-3	3	1	-2	0	3	-2	2	1	-1	1	-2	2	-1	-3	3	2	-3	3	3	2	3	3
Chant_DeccaS	-2	3	-1	-1	1	2	-1	1	1	1	0	1	-1	-1	-3	3	2	-3	3	3	3	3	3
Chant_INA3S	-2	3	-2	2	-1	0	-2	1	1	1	-1	1	-1	-2	-3	3	1	-3	3	3	3	3	3
Chant_AB_KH	1	2	-1	0	-1	-2	1	1	0	-2	0	3	-1	2	-2	3	1	-3	3	2	3	3	3
Chant_XY_KH	-1	3	-2	1	-1	-2	-1	1	1	1	0	1	-1	3	-3	3	-1	-3	3	2	3	3	3
Chant_WFS_A	-2	2	-2	1	-1	2	-3	1	-1	0	1	1	-1	2	-3	3	2	-3	3	2	3	3	2
Chant_WFS_B	-2	3	-1	1	-2	1	-1	0	1	1	-1	1	-2	-1	-3	3	0	-3	3	3	3	3	3
Lodi_Real_vorn_REL	-1	3	3	3	2	3	3	-2	-2	2	3	-3	3	3	3	-3	3	3	-3	3	-3	3	-3
Lodi_AB_REL	-2	3	-1	-1	-1	1	3	1	0	1	0	1	1	1	3	3	2	-3	3	2	2	3	3
Chant_Real_vorn_REL	-2	3	3	0	1	3	2	-2	-1	1	2	-3	2	2	3	-3	2	3	-3	3	-3	3	-3
Chant_XY_REL	-1	3	-1	-1	-1	-1	-1	0	1	1	1	1	-1	3	-3	3	-1	-3	3	2	3	3	3

## Sheet: P 3
Stimulus	Klingt näher - klingt entfernter	Klingt wärmer - klingt neutraler	klingt verschleierter - klingt konturierter	klingt nach engerem Raum - Klingt nach weiterem Raum	Klingt leiser - klingt lauter	Größere Präsenz des tiefen Spektrums - Geringere Präsenz des tiefen Spektrums	Klingt kofferradiohaft - klingt weniger kofferradiohaft	Klingt authentischer (realitätsnah) - klingt weniger authentisch (realitätsnah)	klingt spektral dissoziierter - klingt spektral integrierter	klingt unverzerrt - Klingt verzerrt (Ohasing, Übersteuerung höherer F.)	klingt lebendig - klingt weniger lebendig	Enges Stereopanorama - Weites Stereopanorama	Klingt trocken - klingt hallig	Ensemble klingt näher, Stimme entfernter - Ensemble klingt entfernter, Stimme näher	Klingt körperloser - klingt körperhafter	klingt verschwenderisch - klingt kontrolliert	Instrumente schlecht ortbar - Instrumente gut ortbar	Klingt weich - klingt rau	Geringe Tiefenstaffelung - Höhere Tiefenstaffelung	Klingt indirekt - klingt direkt	Klingt angenehm - klingt unangenehm
Lodi_Real_vorn	1	1	-1	2	-1	-1	-1	2	0	3	1	0	2		0	0	0	1	1	-2	2
Lodi_Real_hinten	3	0	-3	3	-2	0	-1	2	2	-2	-1	2	3		-1	-2	-1	-3	-1	-3	-1
Lodi_Real_vorn_MTB	3	0	-2	2	-1	-1	-1	2	-1	3	0	-1	2		0	-1	-1	0	-2	-2	2
Lodi_Real_hinten_MTB	3	0	-1	2	-2	0	-1	0	2	0	1	1	1		0	0	-1	-1	0	-1	-1
Lodi_Mono	-2	2	2	-2	-1	1	2	-1	2	-2	0	-1	1		-2	0	-1	0	1	-1	0
Lodi_AB	-1	-3	-1	2	2	-2	1	-2	2	-1	-1	2	2		2	-1	2	0	1	-2	-1
Lodi_XY	-2	-1	2	-2	-1	-1	-1	0	2	-2	-1	-2	0		0	1	1	1	1	2	-1
Lodi_ORTF	-2	2	2	-1	0	-1	2	-2	2	-2	-1	-1	1		1	1	1	1	1	1	-2
Lodi_DeccaS	0	2	3	-1	0	-2	3	-3	3	-3	-2	-1	-1		2	-1	1	-1	1	2	-3
Lodi_INA3S	-1	2	2	-1	0	-1	2	-2	2	-2	-1	0	0		-1	1	1	1	2	1	-2
Lodi_AB_KH	1	2	2	-1	-1	0	1	-1	2	-2	-1	0	0		0	-1	1	0	1	1	-2
Lodi_XY_KH	-2	1	2	-2	0	2	0	0	2	-2	-1	-2	-2		-2	1	0	1	-1	1	0
Lodi_WFS_A	1	2	-1	-1	0	1	-1	1	0	-2	1	0	0		-1	0	1	-1	0	1	1
Lodi_WFS_B	1	0	1	-1	0	1	-1	-2	2	-2	-1	-1	-2		0	0	2	1	0	2	-2
Chant_Real_vorn	-1	-1	1	1	0	-2	0	1	-3	0	-1	0	2	-2	-1	0	-1	0	0	1	1
Chant_Real_hinten	2	0	-2	2	0	0	-1	2	-2	0	0	-1	2	-3	-1	0	-2	0	-1	-3	1
Chant_Real_vorn_MTB	-2	0	2	-1	1	0	0	-1	-1	-2	0	1	1	0	1	0	1	1	0	1	1
Chant_Real_hinten_MTB	2	-1	-2	2	0	0	-1	2	-1	-2	0	2	2	0	-2	-1	-1	-3	-2	-3	0
Chant_Mono	-2	1	2	-2	0	1	-2	1	0	0	1	-2	-1	1	1	1	1	-1	1	1	1
Chant_AB	-2	-1	2	-1	1	-1	2	-2	2	-3	-2	-1	1	3	-1	0	1	0	1	2	-2
Chant_XY	-2	2	2	0	0	-2	3	-2	2	-3	-2	-2	1	0	2	-2	2	0	1	2	-2
Chant_ORTF	-1	-1	-1	-1	2	0	-1	1	1	-1	-1	-1	0	1	-1	1	-1	1	-1	-1	0
Chant_DeccaS	-3	-2	2	-2	1	-2	2	-3	3	-2	-2	0	0	0	2	-1	1	1	2	-2	-2
Chant_INA3S	-2	0	2	-2	1	0	2	-2	2	-2	-2	0	0	0	-1	1	1	1	1	2	-1
Chant_AB_KH	-2	1	2	-1	0	0	-1	1	2	-2	1	1	-1	0	1	3	1	0	1	1	0
Chant_XY_KH	-2	2	2	-2	-1	1	-1	0	2	-1	1	-3	-1	0	-1	0	0	2	0	1	1
Chant_WFS_A	-1	-3	2	0	1	-3	2	1	1	-2	-2	0	0	0	2	0	1	-2	-1	1	-1
Chant_WFS_B	-3	-3	2	-3	1	-3	0	1	0	-2	-1	2	0	1	1	1	2	0	0	0	-1
Lodi_Real_vorn_REL	2	1	-2	2	-1	1	-2	3	-1	3	2	0	3		0	0	0	1	0	2	2
Lodi_AB_REL	1	2	-2	2	-2	1	-1	1	1	1	0	-1	2		-1	0	1	0	1	0	-1
Chant_Real_vorn_REL	2	1	-2	1	-1	2	-1	1	-1	-1	2	0	1	-1	0	1	-1	-1	1	-3	1
Chant_XY_REL	-1	-1	2	-1	0	-1	2	-1	2	-3	-2	1	-1	2	-1	-1	0	-2	0	1	-2

## Sheet: P 4
Stimulus	Räumlich flacher Klang - räumlich präsenter	Klanglich schräbbelig - voller Klang	Lauter - leiser	Klangliche Katastrophe - klanglich gut	Schräbbelig - mehr Bässe	Natürlich - künstlich	Gefiltert/ ohne Bässe - natürliche Klanggebung	Stimme im Vordergrund - Stimme hebt sich nicht ab	Räumliche Tiefe - räumliche Breite d. gesamten Klangbilds	Schlechte Textverständlichkeit - gute Textverständlichkeit	Eigenartiger Klick bei Gesangsbeginn (Mikrophon?) - ungestörter Einsatz der Stimme	Entfernt (Klang) - nah	Angenehme mittlere Räumlichkeit - zu nah/zu entfernt	Einigermaßen natürlich - weltmeisterschaft im gepressten Klangbild	Hallig - trocken	Stimme leicht links - mittig	Linkslastig - mittitges ausgewogenes Klangbild	Enges Panorama (räumlich, flach), klingt wie Mono - natürliches Panorama	Aggressiv, hart, evt. Etwas mehr Höhen, technische Ursache - sanft im Gesamtklang, technische Ursache	Ausgewogenes Gesamtklangbild - gepresst bzw. unausgewogenes Klangbild	Angenehme Rezeptionsdistanz - zu nah am Ohr	Größeres Panorama, angenehme Entfernung enges Panorama, zu nah	Entfernt (Klang und Bild) - nah, präsent	Höre Stereobild, sehe 1 Lautsprecher - Bild und Klang kongruent	Zuordnung Klang zu Bild (Klang scheint von Bild zu kommen) - Klang kommt aus dem Kopfhörer	Konzertsituation (räumlich) - typische CD-Aufnahme
Lodi_Real_vorn	1	1	-1	1	1	-2	2		2			1	-2	-2	-1		3	2	0	-3	-3	-3	1	3	-3	-3
Lodi_Real_hinten	-1	-1	0	1	1	-1	1		1			-3	2	-2	-2		0	1	0	-1	-3	-1	-3	0	-3	-3
Lodi_Real_vorn_MTB	1	1	-1	2	1	-2	2		2			2	-2	-2	-1		0	2	0	-3	-3	-3	2	3	-3	-2
Lodi_Real_hinten_MTB	1	1	0	1	0	-2	2		0			-1	-1	-2	-2		2	2	0	-3	-3	-1	-2	0	-3	-2
Lodi_Mono	-1	-1	0	0	-1	-1	1		0			-1	0	0	-1		1	-3	-2	-1	-2	3	1	3	-3	2
Lodi_AB	-1	-1	0	1	1	-1	1		1			1	-1	-1	-1		2	2	-1	-1	1	-2	1	-3	3	-1
Lodi_XY	-2	-1	-1	-2	-2	2	-1		1			-1	-1	1	-1		-1	-1	0	1	0	2	0	-3	1	1
Lodi_ORTF	-1	-1	-1	1	-1	-1	1		1			1	-2	-1	1		1	1	-1	-1	-1	-1	1	-3	2	1
Lodi_DeccaS	1	-1	-1	1	0	-1	-1		1			-1	-1	-1	0		1	1	0	1	-1	1	1	-3	2	1
Lodi_INA3S	1	1	0	1	1	-2	2		2			1	-1	-2	0		2	2	-1	-1	1	0	1	-3	3	1
Lodi_AB_KH	1	-1	0	1	-1	1	-1		1			-1	-1	1	1		1	-1	-1	1	1	2	0	0	3	1
Lodi_XY_KH	-1	-2	-1	-1	-2	2	-2		0			0	0	1	2		-1	-3	-2	-1	3	3	0	-1	3	2
Lodi_WFS_A	-1	1	0	1	-1	-1	-1		0			1	-2	-1	-1		0	2	2	1	-2	-2	0	0	2	-1
Lodi_WFS_B	0	-1	-1	-2	-1	1	-1		1			0	0	2	0		-1	1	-2	1	1	0	0	0	0	1
Chant_Real_vorn	-1	1	0	1	0	-1	1	1	3	-2	-1	-1	-2	-2	-1	2	2	2	-1	-2	1	-1	-1	0	1	2
Chant_Real_hinten	1	1	3	-2	0	0	1	1	0	2	0	-3	3	-2	-3	3	2	1	0	-3	-3	0	-3	0	-3	-1
Chant_Real_vorn_MTB	1	2	-2	2	1	-3	3	-1	1	-1	2	1	-2	-3	-2	-2	-1	2	-2	-2	-1	0	1	0	2	-1
Chant_Real_hinten_MTB	-1	0	1	-1	0	-1	1	2	0	-3	0	-3	3	-2	-3	0	1	-3	0	-2	-1	1	-3	0	-3	-2
Chant_Mono	-1	-1	0	0	-1	1	-2	-2	0	2	-2	-1	0	1	1	2	2	-2	1	0	-1	2	0	-1	1	1
Chant_AB	-2	-2	0	-1	-2	1	-2	-3	1	3	-3	1	-2	-1	2	-1	1	-1	-1	-1	0	3	2	0	2	1
Chant_XY	2	1	0	1	1	-2	2	-2	-1	2	1	1	-2	-2	-1	-1	-1	2	0	-2	-2	-2	1	-3	3	-1
Chant_ORTF	1	2	-1	2	0	-1	0	-2	1	2	-1	0	-1	-2	0	-2	-2	0	-1	1	-2	-1	0	-3	2	-1
Chant_DeccaS	-1	0	0	1	1	-1	2	-2	1	3	3	1	-2	-2	-1	-1	-1	1	-1	-1	0	-1	0	-3	3	1
Chant_INA3S	-1	-1	0	-1	-1	1	-1	-2	0	3	-1	1	-1	0	2	2	2	-3	-1	-1	2	3	0	0	3	1
Chant_AB_KH	1	-1	0	1	-1	-1	0	-2	-1	2	-1	1	-2	-2	-1	-1	0	1	-1	-1	-1	-2	1	-2	3	1
Chant_XY_KH	1	-1	0	1	1	-1	1	-1	1	0	2	-1	-1	-1	-1	1	1	1	1	-1	1	2	1	-2	3	1
Chant_WFS_A	2	2	-1	2	1	-2	2	-2	2	3	-1	2	-2	-2	-1	2	2	2	-1	-2	-1	-1	0	0	2	2
Chant_WFS_B	1	0	0	1	2	-1	2	-3	3	3	0	1	-2	-2	-1	2	2	3	-1	-2	-1	-3	0	0	3	1
Lodi_Real_vorn_REL	1	2	0	3	2	-2	2		2			1	-1	-2	-1		2	2	0	-3	-2	-2	1	0	1	-1
Lodi_AB_REL	-1	-1	0	-1	-1	1	-1		2			-1	-1	1	-1		2	1	0	-1	0	0	0	-3	2	1
Chant_Real_vorn_REL	1	1	0	1	1	-1	2	1	-1	-2	-1	-1	-1	-1	-2	2	1	2	-1	-2	-1	-2	1	2	-1	-2
Chant_XY_REL	-1	1	-1	1	0	-1	1	-2	-1	3	-2	1	-2	-2	-1	1	1	1	0	-1	-2	-1	1	-1	3	-1

## Sheet: P 5
Stimulus	Eindimensionaler Klang - mehrdimensionaler Klang (räumlich)	Klang flach und dünn (ohne Tiefen) - voluminöser Klang, ausgewogenes Frequenzbild	Gesangsstimme im Zentrum meines Kopfes - Gesang nicht akustisch zu orten	Gesang unterrepräsentiert - Gesang überrepräsentiert	Zu enge Stereoanordnung - weites Stereobild	Stimme geht völlig unter - erkennbare Stimme	Höhlenakustik - kontrollierter Nachhall	Mehr Schärfe (mehr Höhen) - mehr Wärme akustisch	Offener Klang (weites Stereobild) - enge Klangperspektive	Mono - stereo oder räumlich	Sehr durchsichtig und klare Positionierung - mulmig	Eindruck fehlender Bässe - Ausgewogenes Freqzenzbild	Gesang geht direkt in die Seele (emotionalisierend) - gefühlsneutral	Angenehmer Gesamtklang - unangenehmer Klang	Dreidimensionales Bild, Tiefe akustisch und optisch - flach Bild und Ton	Sendebild akustisch und optisch über Fernsehen - Konzerterlebnis	Ausgewogener Klang, Sendebild (geschnitten) - Konzerterlebnis	Konzertmitschnitt (Bild) - Live	Klang entspricht den positionierten Lautsprechern - akustisch eng	Mischung ist bildbezogen - rein akustische Mischung (Tonträgermischung)	Akustische Position passt zum Bild - Positionierung der Instrumente passt nicht	Gesang akustisch entfernter als optisch - Gesang im Vordergrund	Musiker wirken sehr verloren optisch und akustisch - angemessen Darstellung der Künstler	Zu viel Hall für Bildeindruck - zu wenig Hall bezogen aufs Bild	Extrem weiter Bildwinkel - ausgewogenes Bild	Bild in artifizieller Umgebung - natürliche Umgebung	Feste Perspektive (Totale) - geschnittene Bildfolge	Gelblicher Farbton (Kunstlichtumgebung) - Tageslichtbeleuchtung (bläulich)	Rotes Kleid sticht hervor gegen schwarzen Hintergrund - farblich gleichförmig	Optisch schwarz vorherrschend - bunt
Lodi_Real_vorn	3	3			3		3	-1	-3	3	-3	3	0	-3	-3	3	3	3	-3	-2	-2		3	0	-1	3	-3	3		-3
Lodi_Real_hinten	1	1			1		-2	1	1	1	2	1	0	-1	-1	2	2	2	-2	-2	-2		-3	-1	-3	3	-3	1		-3
Lodi_Real_vorn_MTB	3	3			3		2	2	-3	3	-3	3	-2	-3	-3	3	3	3	-3	-3	-3		3	-1	3	3	-3	3		-3
Lodi_Real_hinten_MTB	2	-2			-3		1	0	3	-3	1	-1	0	0	2	3	0	1	2	2	3		-3	1	-3	2	-3	3		-3
Lodi_Mono	1	-1			-2		2	1	2	-2	1	2	0	-2	-2	1	-2	-2	2	2	2		3	0	3	-2	3	-3		3
Lodi_AB	3	3			3		2	2	-3	3	-2	3	-2	-3	-3	3	-3	3	-3	-2	-2		3	-1	3	-2	3	-3		3
Lodi_XY	-2	-2			-3		1	3	2	-2	2	-2	0	-2	2	-1	-2	-2	2	2	1		3	1	3	-2	3	-3		3
Lodi_ORTF	1	2			-2		1	-1	-3	2	-1	3	-2	-2	-2	1	-2	-2	-2	3	3		3	0	3	-2	3	-3		3
Lodi_DeccaS	3	3			3		2	2	-3	3	-1	3	-3	-3	-3	-3	-3	-3	-2	2	2		3	1	3	-2	3	-3		3
Lodi_INA3S	2	3			3		2	2	-3	3	-1	2	-1	-3	-2	2	2	2	-3	3	0		3	0	3	-2	3	-3		3
Lodi_AB_KH	3	2			3		2	-1	-3	2	-2	2	0	-2	-2	2	-3	3	-2	-2	-1		3	1	3	-2	3	-3		3
Lodi_XY_KH	2	-2			-3		2	-3	3	-2	1	-1	0	2	2	-2	0	-1	2	2	2		3	1	3	-3	3	-3		3
Lodi_WFS_A	3	1			3		2	-1	-3	3	-2	1	-2	-2	1	3	3	3	-3	-3	-3		3	1	3	-2	3	-3		3
Lodi_WFS_B	2	1			2		3	-3	-3	2	-1	-1	0	1	0	-1	0	-2	-1	3	0		3	1	0	0	0	-3		2
Chant_Real_vorn	3	3	-1	-1	2	3	2	0	-3	3	-1	3	-2	-3	-3	3	2	2	-3	-2	-2	1	3	-1	-1	2	-3	3	-3	-2
Chant_Real_hinten	-2	-2	3	-3	-2	-3	1	2	3	-2	2	0	3	1	2	1	1	2	3	0	2	-3	-3	2	-3	1	-2	3	-3	-2
Chant_Real_vorn_MTB	3	2	-1	0	2	3	2	-1	-3	3	-3	3	-2	-3	-3	3	3	3	-3	-3	-3	2	3	1	3	3	-3	3	-3	-2
Chant_Real_hinten_MTB	2	-1	3	-3	1	-2	-1	1	-2	-3	2	-1	3	2	1	-1	1	2	-1	-2	-2	-3	-3	1	-3	2	-3	3	-3	-2
Chant_Mono	-2	-2	3	2	-3	3	1	1	2	-2	0	-1	2	3	2	-2	-2	-2	2	1	3	3	3	1	3	-2	3	-3	-2	3
Chant_AB	1	3	-3	1	-1	2	2	2	-2	2	-1	2	-3	-1	-2	-2	-2	-2	-3	-1	-1	2	3	0	2	-3	3	-3	-2	2
Chant_XY	2	3	-3	1	2	3	1	2	-2	2	-2	3	-2	-3	-2	-2	-2	-2	-2	-1	-1	3	3	1	3	-2	3	-3	-1	3
Chant_ORTF	-3	-2	2	1	-3	3	3	-2	3	-3	0	1	2	2	2	0	-2	-1	2	3	-2	2	3	0	3	-3	3	-3	0	3
Chant_DeccaS	1	2	-1	1	2	3	2	1	-2	1	-1	2	-2	-2	0	-2	-1	-2	-1	-1	2	2	3	1	3	-2	3	-3	-1	2
Chant_INA3S	2	2	-3	1	0	3	1	2	-2	2	-1	2	-2	-3	-2	-3	-1	-2	-3	-2	1	2	3	2	3	-2	3	-3	-2	3
Chant_AB_KH	3	2	-3	2	2	3	1	2	-3	3	-2	2	-3	-3	-3	-2	-1	-2	-3	-2	-2	3	3	1	3	-2	3	-3	-2	3
Chant_XY_KH	1	-2	1	1	2	3	1	-2	-2	2	-1	-2	2	-1	-2	-3	-2	-2	1	2	-1	3	3	2	3	-1	3	-3	-2	3
Chant_WFS_A	2	-2	-2	2	1	3	2	-2	-1	2	0	0	0	1	-1	-1	-1	-3	-2	3	2	2	3	2	3	-2	3	-2	-2	2
Chant_WFS_B	3	-2	1	2	-1	3	2	-1	-3	2	-2	3	-2	1	-2	-1	-1	-3	0	2	2	2	3	1	3	-3	3	-3	-1	3
Lodi_Real_vorn_REL	3	2			3	0	2	0	-3	3	-2	3	-2	-3	-3	3	3	2	-3	-1	-3		3	-2	2	3	-3	3		-3
Lodi_AB_REL	-2	3			-3	0	1	3	2	-2	1	1	0	-3	-1	-2	-2	-2	2	2	-2		3	1	3	-2	3	-3		2
Chant_Real_vorn_REL	3	2	1	-2	3	3	3	1	-3	3	-2	3	-1	-2	-3	3	-2	2	-2	-3	-3	-1	3	-1	-1	2	-3	3	-3	-3
Chant_XY_REL	3	3	-3	1	3	3	1	-1	-3	3	-2	2	-2	3	-3	-3	-3	-2	-1	3	2	2	3	1	3	-2	3	-3	-2	3

## Sheet: P 6
Stimulus	Voller Klang (mehr Raumklang) - Flacher Klang	Hellerer Klang - Natürlicher Klang	Klingt leicht übersteuert - Korrekte Aussteuerung	Leiser - Lauter	Ohne Tiefe, nicht in den Raum greifend - Voluminöser, umgreifend vom Zuhörer aus gesehen	Klang wie Monoaufnahme - Stereo	Sängerin war in meinem Kopf - Sängerin vor mir	Breiter Klang - Schmaler und näher am Zuhörer	Hellerer Klang - Dunklerer Klang	Fehlende Mitten - Vollständiger Klang	Stimme im Einklang mit dem Orchester - Stimme herausgehoben	Schleier über der Musik - Klarer Klang	Klang um mich herum auch von links und rechts - Klang hauptsächlich vor mir. Weniger raumgreifend	Höhere Präsenz der Sängerin im Raum (tritt hervor) - Orchester und Sängerin auf einer Ebene	Klang und Orchester (Bild) weit entfernt vom Zuhörer - Beides näher am Zuhörer	Angenehmeres Musikempfinden durch Bild - Lautsprecheransicht zu technisch (Ablenkung von Musik)
Lodi_Real_vorn	-3	3	3	0	2	3		-2	0	3		3	-2		3	-3
Lodi_Real_hinten	-1	2	3	-2	1	3		-2	1	2		2	-1		-3	-2
Lodi_Real_vorn_MTB	-1	2	3	1	2	3		-1	0	3		3	-1		2	-3
Lodi_Real_hinten_MTB	1	2	3	-2	-1	3		-1	1	3		2	0		-3	-2
Lodi_Mono	1	2	3	0	-2	-3		2	-1	3		3	3		2	3
Lodi_AB	-2	3	3	0	2	3		-2	0	3		3	-2		2	3
Lodi_XY	1	2	3	0	-1	3		2	0	3		3	2		3	3
Lodi_ORTF	-1	3	3	0	2	2		1	0	3		3	1		2	3
Lodi_DeccaS	-1	3	3	0	2	3		-2	0	3		3	-2		2	3
Lodi_INA3S	-2	3	3	0	2	3		-2	0	3		3	-2		2	3
Lodi_AB_KH	-3	3	3	0	3	3		-3	0	3		3	-3		3	3
Lodi_XY_KH	0	1	2	0	1	-2		3	-1	2		3	1		2	3
Lodi_WFS_A	-1	0	3	0	1	3		-2	-1	2		3	-2		2	3
Lodi_WFS_B	-3	1	2	0	3	3		-3	0	3		3	-3		2	3
Chant_Real_vorn	-2	2	2	0	1	3		-2	0	3	1	3	-2	2	3	-3
Chant_Real_hinten	1	1	1	-3	-3	3	3	-2	3	1	-3	-2	-2	3	-3	-2
Chant_Real_vorn_MTB	-1	2	2	0	1	3	2	-1	0	3	-3	3	-1	3	2	-3
Chant_Real_hinten_MTB	2	0	2	-2	-2	2	3	0	1	0	0	-2	2	3	-3	-2
Chant_Mono	2	0	0	-1	-1	-2	-1	2	-2	1	2	2	2	1	1	3
Chant_AB	-2	2	3	0	2	3	-2	-2	0	3	3	3	-2	-2	3	3
Chant_XY	-2	3	3	0	1	2	-1	1	0	3	3	3	1	-1	2	3
Chant_ORTF	-2	2	3	1	2	3	-2	-1	-1	3	3	3	-2	-3	3	3
Chant_DeccaS	-3	3	3	0	2	3	-2	-2	0	3	2	3	-2	-3	3	3
Chant_INA3S	0	3	3	0	1	3	-3	-2	0	3	2	3	-1	-2	3	3
Chant_AB_KH	-2	2	3	0	2	3	-3	-2	0	3	3	3	-2	-2	2	3
Chant_XY_KH	1	2	3	0	1	-2	-3	3	-1	2	2	3	2	-2	2	3
Chant_WFS_A	-2	-1	2	0	2	3	-1	-1	-1	2	1	3	-2	-1	2	3
Chant_WFS_B	-3	-1	2	0	3	3	0	-3	-1	2	0	3	-3	-1	3	3
Lodi_Real_vorn_REL	-2	3	3	0	2	3		-2	0	3		3	-2		3	-3
Lodi_AB_REL	-2	3	3	0	2	3		-2	0	3		3	-2		2	3
Chant_Real_vorn_REL	-1	2	3	0	1	3	2	-2	0	3	-3	3	0	3	3	-3
Chant_XY_REL	0	1	3	3	1	-2	-3	2	-1	3	3	3	1	-2	3	3

## Sheet: P 7
Stimulus	Natürlicher Klang - nachbearbeiteter Klang	Viel Hall - wenig Hall	Lauter - leiser	Bauchiger Klang - linearer Klang (direkt)	Ausgetrocknet - voluminös/ödenatös/substanzhaltig	Schrill - weich	Hohe Instrumente kommen stärker raus tiefe Instrumente kommen stärker raus	Schlechte Balance Begleitung/Gesang - gute Balance Begleitung/Gesang	Begleitung störend - Begleitung unterstützend	Dramatisch - steril	Klang einer leichten Bogenführung - Klang einer steifen/gedrückten Bogenführung	Spielnebengeraeusche (Kratzen) vorhanden - Spielnebengeräusche nicht vorhanden	Stimme ändert Distanz mit Tonhöhe (tief-weit, hoch-nah) - Stimme bleibt gleich entfernt	Artikulation schlechter hörbar - Artikulation gut hörbar	Weit entfernt - nah	Verfremdet (schlechtes Radio) - authentisch (gutes Radio)	Metallisch - seidig	Flach, ohne Schwingungen - nicht flach, mit Schwingungen	Stimme leiser als Begleitung - Stimme lauter als Begleitung	Lautstärke Stimme=Begleitung > Gegenstimme - Lautstärke Stimme = Begleitung = Gegenstimme	Unterkühlter Klangeindruck/unwohl - warmer Klangeindruck/angenehm	Ambiente wie großes Konzert - Ambiente wie Probedurchlauf (+anderer Raum?)
Lodi_Real_vorn	-1	-2	1	-1	1	0	0	2	3	-2	-1	2		-1	1	2	2	2	0	3	1	1
Lodi_Real_hinten	3	2	3	-2	1	1	0	2	3	-1	-3	2		-1	-3	-1	2	1	3	3	3	2
Lodi_Real_vorn_MTB	1	-1	2	-1	1	-1	1	2	3	1	-1	-1		1	0	1	2	2	1	3	1	-1
Lodi_Real_hinten_MTB	2	-2	2	-2	2	2	2	2	3	0	-2	2		1	1	2	3	2	1	0	3	-1
Lodi_Mono	2	3	1	3	-3	-2	0	0	0	2	1	-2		2	-2	-1	-2	-1	0	3	-1	1
Lodi_AB	2	1	0	-1	-2	-1	0	-1	1	-1	-1	-1		2	1	0	0	1	0	3	1	2
Lodi_XY	2	3	2	3	-3	-1	-1	1	1	1	-1	-2		1	1	-1	-2	1	3	2	-1	3
Lodi_ORTF	1	2	2	2	1	1	2	3	3	1	-1	-1		-1	2	2	1	1	0	3	2	0
Lodi_DeccaS	2	2	2	1	-1	1	2	-1	-2	-1	-2	2		2	0	2	1	2	3	0	1	1
Lodi_INA3S	-2	2	1	1	-1	-2	-1	3	3	1	-1	3		3	0	1	1	1	0	3	-1	1
Lodi_AB_KH	1	1	1	0	-1	-2	2	1	3	2	1	-1		2	-1	1	0	1	0	-1	-1	2
Lodi_XY_KH	3	3	3	3	-3	-2	-2	-2	2	2	2	-2		3	1	1	-2	-2	0	3	-2	3
Lodi_WFS_A	2	0	2	-3	-1	1	0	-2	-1	1	0	-1		2	-2	1	-3	-2	-1	3	-2	2
Lodi_WFS_B	2	1	1	2	-1	-2	-2	-2	2	2	1	-1	2	2	1	-1	-2	-2	1	-1	-2	2
Chant_Real_vorn	-1	-2	-1	-1	1	0	2	1	2	-1	0	1	3	2	1	1	0	1	2	3	1	-1
Chant_Real_hinten	1	0	2	-2	2	1	3	-3	2	-1	-2	2	3	-2	-3	1	2	2	-3	0	2	-1
Chant_Real_vorn_MTB	-1	-2	-1	1	-1	-1	1	-1	-2	1	1	2	3	1	2	1	-2	1	3	3	-1	0
Chant_Real_hinten_MTB	-3	0	2	-2	2	2	1	-3	3	-2	-2	2	3	1	-3	-1	2	2	-3	0	3	1
Chant_Mono	-1	0	1	1	-1	1	1	2	0	0	1	-1	-2	1	1	0	-1	-2	3	3	0	1
Chant_AB	2	3	0	2	-1	1	-1	2	-1	1	0	2	3	3	1	3	-1	-1	2	-1	-1	-1
Chant_XY	-2	2	2	1	-1	1	0	1	2	0	0	0	3	-1	2	1	0	1	0	3	1	-1
Chant_ORTF	-2	2	0	1	-1	1	2	2	2	0	-1	2	3	1	2	1	1	1	2	0	1	0
Chant_DeccaS	-1	2	0	2	-1	1	0	2	2	-1	-1	2	3	-1	-2	1	-1	-1	3	1	0	1
Chant_INA3S	1	1	0	-1	1	1	2	2	2	2	1	-2	3	-1	2	1	1	-1	3	3	1	1
Chant_AB_KH	1	3	1	2	-2	0	1	2	0	1	-1	1	-1	1	0	1	1	0	2	3	1	2
Chant_XY_KH	1	3	2	0	1	3	1	3	2	-2	-1	2	3	2	-2	1	1	1	3	3	2	0
Chant_WFS_A	1	2	1	2	-1	-1	0	-1	-1	2	0	1	3	3	1	1	-1	1	3	3	-2	1
Chant_WFS_B	2	3	0	2	-1	-2	2	3	1	2	-2	1	3	1	-1	1	-2	-1	3	3	-1	2
Lodi_Real_vorn_REL	2	-2	-2	2	-1	-2	-2	1	3	-1	-2	2		1	1	1	2	1	1	3	1	-1
Lodi_AB_REL	1	-1	2	2	-1	-1	-2	1	3	1	0	1		-1	0	0	1	-2	1	3	1	2
Chant_Real_vorn_REL	-2	0	2	0	0	0	1	2	1	-1	-2	2	-1	0	1	1	-1	-1	3	3	1	1
Chant_XY_REL	-1	0	1	1	-1	0	1	2	3	1	2	2	3	2	-1	1	0	1	3	3	2	1

## Sheet: P 8
Stimulus	Klingt nach größerem Raum - kleinerer Raum	Es klingt höhlenartig und hallt - hallt nicht	Instrumente auf Bühne in weiterem Bogen platziert - stehen enger zusammen	Klang kommt von vorn, wie mono - Klang kommt von oben und rundherum, wie Stereo	Klang ist heller, Bässe schwächer - Klang ist dunkler, Bässe stärker	Musik spielt im Kopf - Musik spielt im Ruam	Bei Kopfbewegung bewegt sich Musik mit - bei Bewegung bleibt Musik auf der Stelle	Vor Beginn Geräusche: Plattennadel, Saalgeräusche - keine Vorgeräusche	Musik kommt on rechts vorne - Musik kommt zentral von vorn	Musikquelle ist weiter entfernt - Musikquelle ist nahe	Musik ist leiser - Musik ist lauter	Violinen sitzen rechts, Celli links - Violinen links, Tiefe Streicher rechts	Studioaufnahme ohne Nebengeräusche - Livemitschnitt mit Nebengeräuschen	Nur Stimme klingt weiter entfernt - nur Stimme klingt näher	Der Klang ist voller, bessere Lautsprecher - klingt blechern wie aus schlechteren Lautsprechern	Klang ist räumlich flacher - Klang ist räumlich tiefer	Musik kommt von vorne - Musik kommt von hinten	Ich sitze mitten im Orchester - ich sitze außerhalb vom Orchester
Lodi_Real_vorn	0	0	0	0	0	3	3	3	3	2	0	3	-3		1	1	-3	3
Lodi_Real_hinten	0	0	0	0	0	3	3	3	-1	0	0	-3	-3		0	0	-3	3
Lodi_Real_vorn_MTB	-2	0	-1	0	1	3	3	-1	3	1	0	3	-3		-1	1	-3	3
Lodi_Real_hinten_MTB	-1	0	0	0	0	3	3	3	-3	-2	0	3	-3		1	1	-2	3
Lodi_Mono	0	0	0	0	0	3	3	3	3	0	0	1	-3		1	0	-3	3
Lodi_AB	0	2	0	0	1	3	3	3	3	1	0	3	-3		0	0	-3	3
Lodi_XY	0	0	0	0	-1	3	3	3	3	1	0	3	-3		1	-1	-3	3
Lodi_ORTF	0	0	0	0	-1	3	3	3	3	0	0	3	-3		0	0	-3	3
Lodi_DeccaS	0	0	0	0	-1	3	3	3	3	2	0	3	-3		1	0	-3	3
Lodi_INA3S	0	0	0	0	-1	3	3	3	3	0	0	3	-3		2	0	-3	3
Lodi_AB_KH	0	0	0	0	0	-1	0	3	0	0	0	0	-3		0	0	3	3
Lodi_XY_KH	0	2	0	0	-1	-3	-3	3	0	0	0	3	-3		3	0	0	0
Lodi_WFS_A	0	0	0	0	0	3	3	3	3	0	0	3	-3		0	2	-3	3
Lodi_WFS_B	0	0	0	0	0	3	3	3	0	3	0	3	0		0	1	0	-3
Chant_Real_vorn	0	0	0	0	-1	3	3	3	3	-1	0	3	-3	-2	1	0	-3	3
Chant_Real_hinten	-1	0	0	0	-1	3	3	3	-3	-3	1	3	-3	-3	1	0	-3	3
Chant_Real_vorn_MTB	0	0	0	0	0	3	3	3	2	1	0	3	-3	-1	1	0	-3	3
Chant_Real_hinten_MTB	0	-1	0	0	-2	3	3	3	-3	0	0	0	0	-3	0	0	-3	3
Chant_Mono	0	-1	0	0	-1	3	3	3	3	1	0	3	-3	0	1	0	-3	3
Chant_AB	0	0	0	0	1	3	3	3	3	1	0	3	-3	0	1	0	-3	3
Chant_XY	0	0	0	0	0	3	3	3	3	2	0	3	-3	0	0	0	-3	3
Chant_ORTF	0	0	0	0	0	3	3	3	3	3	0	3	-3	2	0	0	-3	3
Chant_DeccaS	1	1	0	0	0	3	3	3	3	3	0	0	-3	0	0	1	-3	3
Chant_INA3S	1	1	0	0	1	3	3	3	3	3	1	0	-3	0	0	0	0	3
Chant_AB_KH	0	0	0	0	0	-3	-3	3	0	0	0	3	-3	0	1	-1	0	0
Chant_XY_KH	0	1	0	0	0	-3	-3	3	0	0	0	3	-3	0	0	0	0	0
Chant_WFS_A	0	0	0	0	0	3	3	3	3	1	0	0	-3	0	1	-1	-3	3
Chant_WFS_B	0	0	0	0	0	3	3	3	0	1	0	3	-3	0	0	1	-1	3
Lodi_Real_vorn_REL	0	0	0	0	2	3	3	3	3	1	1	3	-3		0	1	-3	3
Lodi_AB_REL	0	0	-1	0	1	3	3	3	2	0	0	3	-3		0	0	-2	3
Chant_Real_vorn_REL	-2	1	0	0	1	3	3	3	3	1	1	0	-3	0	-2	1	-2	3
Chant_XY_REL	0	0	0	0	0	3	3	3	3	3	0	0	-3	3	-2	-1	-3	1

## Sheet: P 9
Stimulus	Klingt wie Studioaufnahme - klingt wie Livekonzertaufnahme	Synthetischer/Studiohall - "echter" Raumhall	Klingt nah - Klingt weiter weg und klanglich verwischter	Saiten-/Instr.geräusche/Instrumente gut zu unterscheiden - Saiten-/Instr.ger.Instrumente nicht so gut zu unterscheiden	Weniger hohe Frequenzen - mehr hohe Frequenzen	Klingt organisch/natürlich - klingt elektrisch/künstlich	Sängerin klingt näher als Streicher - Sängerin auf gleicher Ebene	Sängerin klingt nicht so kraftvoll/abgemischt - Sängerin klingt kraftvoll/abgemischt	Hat unnatürlich viele Höhen - haben normal viele Höhen	Klingt kälter (weniger Tiefen, mehr Höhen) - klingt wärmer (alle Frequenzen da)	Balance der Instrumente nicht ausgeglichen (Lautstärke) - Balance gut ausgeglichen	Sängerin kaum hörbar - Sängerin gut hörber	Stimme klingt variabler/interessanter - Stimme klingt invarianter/flacher	Aufnahme klingt überzeugend wie im Konzertsaal - Aufnahme klingt synthtisch nach Studio	Aufgelöster, klarer, weiterer Klang - "Badezimmersound"	Keine Dynamikkompression - Hörbare Dynamikkompression	Keine lokalen Frequenzpeaks - lokale Frequenzpeaks	Man glaubt mehr Musiker zu hören als da sind - man hört die Originalbesetzung exakt	Streicher halten sich hinter Solistin zurück - Streicher spielen sehr dynamisch	Stimme klingt unangenehm quietischig - Stimme klingt schön	Führt zu angenehmen (beruhigenden) Hörerlebnis - hektisches Hörerlebnis	Mehr Spannung, da Publikum Atem anhält - Kein Publikum hörbar	Unnatürlich nah, falsches Verhältnis von Instr. und Raum - Klangverhältnis entspricht Erwartungen	Ton passt nicht so gut zum Bild - Ton passt gut zum Bild	Wirkt mehr wie eine Monoaufnahme (Ton & Bild) - wirkt eher wie Stereo (Ton & Bild)	Studiomonitor (Bild) - Kammermusikraum (Bild)
Lodi_Real_vorn	2	2	1	2	2	-1			1	1	1			-2	-1	-2	-2	-1	0		-2	1	1	1	1	3
Lodi_Real_hinten	3	3	3	3	-1	-2			2	2	0			-1	-1	0	0	-1	3		-1	3	2	0	1	3
Lodi_Real_vorn_MTB	3	3	3	3	2	-2			1	1	1			-1	0	0	-3	1	2		-2	3	1	2	3	3
Lodi_Real_hinten_MTB	3	3	3	2	1	-3			3	3	3			-2	0	-3	-3	-1	3		-3	-3	3	3	3	3
Lodi_Mono	2	0	-1	-1	-1	-1			1	1	1			-2	-1	0	-3	2	2		-2	3	1	0	1	-3
Lodi_AB	2	2	-1	0	0	-1			2	2	2			-3	-3	-3	-2	1	3		-3	3	3	0	2	-3
Lodi_XY	-1	-1	-1	-2	1	1			1	0	2			-1	-1	3	2	2	2		-1	3	0	1	0	-3
Lodi_ORTF	3	2	-1	0	-1	-1			1	1	2			-2	-2	0	-1	1	0		-2	3	0	1	-3	-3
Lodi_DeccaS	-1	0	-2	-2	-2	-2			2	3	3			-3	-2	-3	-3	-3	3		-3	3	3	2	-2	-3
Lodi_INA3S	-2	-2	-2	1	1	1			0	-1	3			-2	-1	-3	-1	2	2		1	3	0	1	2	-3
Lodi_AB_KH	-1	-2	-2	-2	-2	0			-1	-1	1			-1	-2	0	-1	0	-1		-1	3	0	-2	2	-3
Lodi_XY_KH	-2	-1	0	1	2	1			1	-1	2			-2	-2	0	0	3	2		0	3	-1	1	2	-3
Lodi_WFS_A	1	1	1	1	-1	0			0	1	1			-1	-1	-2	-2	-2	1		-2	0	0	-3	0	0
Lodi_WFS_B	1	2	1	2	0	1			1	0	2			1	-1	-2	-1	3	3		1	0	2	2	3	0
Chant_Real_vorn	3	3	3	3	1	-2	-1	-1	3	3	2	-1	1	0	-1	2	-3	3	-2	1	-1	3	1	3	3	3
Chant_Real_hinten	3	3	2	3	-1	-2	1	-2	2	2	-2	-2	1	0	1	-1	0	0	-1	0	0	1	1	1	2	3
Chant_Real_vorn_MTB	-1	-1	-1	-2	-1	-1	-1	2	2	2	2	2	1	1	0	1	-3	0	-1	2	0	3	1	1	1	3
Chant_Real_hinten_MTB	3	1	3	3	-2	-2	3	-3	0	0	-2	-2	2	1	2	0	-1	-1	-1	0	0	3	1	-2	0	3
Chant_Mono	-3	-2	-2	0	0	-1	2	2	2	1	1	1	-1	-1	1	1	1	1	1	1	0	3	0	0	-2	-3
Chant_AB	-1	1	-1	1	-2	-1	-2	2	2	1	2	3	2	1	0	1	0	3	3	1	2	3	1	0	1	-3
Chant_XY	1	-1	-1	-2	1	0	-2	1	1	1	2	2	-1	-1	-2	0	-1	-2	-2	-1	-1	3	1	0	-1	-1
Chant_ORTF	-2	-2	-2	-2	-1	1	3	3	1	-1	2	3	-1	-2	0	0	1	3	-2	-1	1	3	1	2	-1	-3
Chant_DeccaS	-2	-2	-3	-3	2	1	1	0	1	0	1	1	-1	0	-1	0	1	2	1	1	1	3	-1	1	-2	-3
Chant_INA3S	-3	-2	-2	-1	1	1	1	1	-1	-1	0	2	-1	1	1	1	1	3	2	-2	1	3	1	1	2	-3
Chant_AB_KH	-3	-3	-3	-1	-1	0	1	1	2	0	-1	1	0	1	1	1	1	1	-1	1	1	3	0	0	-3	-3
Chant_XY_KH	-3	-3	-2	2	0	2	2	1	2	1	1	2	2	1	2	1	2	2	-2	-1	2	3	1	1	-3	-3
Chant_WFS_A	-3	-2	-1	-2	1	2	2	3	-2	-2	3	2	1	0	-1	1	2	3	1	2	0	3	-1	2	3	0
Chant_WFS_B	-2	-2	-2	-2	-1	-1	-2	0	0	-1	-1	1	-1	1	1	1	1	-1	-1	-1	1	3	1	-2	-2	0
Lodi_Real_vorn_REL	3	3	1	1	1	0			2	2	2			-2	-2	-3	-3	-1	2		2	-2	2	3	3	3
Lodi_AB_REL	-1	-2	2	2	2	2			1	1	2			-1	-1	3	0	-1	0		0	3	-1	1	2	-3
Chant_Real_vorn_REL	3	3	3	1	-1	-1	0	-1	1	1	2	-1	-1	-1	0	0	0	-1	1	0	-2	1	1	3	0	3
Chant_XY_REL	-3	-2	-2	-2	-1	-1	-2	2	1	2	2	2	-2	-2	0	0	0	-1	-1	0	-1	3	-1	-1	-2	-3

## Sheet: P 10
Stimulus	Klingt blechern - klingt warm und angenehm	Leiser - lauter	Direkt (Klang nur nach vorne gerichtet/wie stereo) - umfassend (Klang aus versch. Richtungen/wie DolbySurr)	Musikalisch Figuren räumlich getrennt (dolby s.) - Gesamtbild der Musik (wie eine Masse)	Musik wirkt größer/voluminöser (Klang) - Musik wirkt flach/nicht lebendig (Klang)	Klingt kratzig - klingen angenehm/natürlich	Musik scheint von vorne zu kommen - Musik scheint aus dem Kopfhörer/ von näher zu kommen	Sängerin im Verhältnis lauter - Musik ausgewogen	Schwammig im Klang (Endungen unsauber gespielt) - klarer im Klang	Musik kommt von beiden Seiten - Musik kommt tendenziell von einer Seite	Dumpfer Klang (wie hinter geschlossener Tür) - deutlicher Klang	Ensemble ausgewogen - hohe Streicher stehen im Vorderung	Sängerin leiser als Hintergrund - ausgewogen	Weniger Hall - gewohnheitsmäßig abgemischt	Klingt kalt/ eher emotionslos gespielt - klingt angenehmer/ intensiver gespielt	Klingt nicht überzeugend (Klang & Bild) - reißen mehr mit	Aufnahme - live (Bild und Klang)
Lodi_Real_vorn	2	3	1	-3	-1	1	-3		2	-3	2	0		1	1	1	2
Lodi_Real_hinten	2	-2	-3	3	1	-1	-3		-2	-3	-2	-3		1	1	-1	3
Lodi_Real_vorn_MTB	2	2	1	-2	-1	3	-2		2	-2	3	2		2	1	1	2
Lodi_Real_hinten_MTB	3	-1	1	-1	-1	3	-3		2	0	1	-2		0	2	2	3
Lodi_Mono	-1	3	1	-3	-1	-1	2		2	3	2	-1		1	1	-1	-1
Lodi_AB	0	3	2	-2	-3	-1	0		2	-2	2	-2		3	-1	1	-1
Lodi_XY	-2	2	-2	-3	2	-1	2		2	2	3	2		1	-1	-1	-2
Lodi_ORTF	-2	2	2	-3	0	-1	-1		-2	0	1	-2		2	0	-2	-3
Lodi_DeccaS	-1	3	2	-2	1	-1	2		2	-2	3	-3		3	-1	-1	-2
Lodi_INA3S	-2	3	2	-1	-1	-1	2		3	-3	3	-2		3	1	-1	-2
Lodi_AB_KH	-1	2	2	-3	1	0	3		1	-3	3	-3		2	1	-1	-2
Lodi_XY_KH	-1	1	0	-3	-1	-2	3		2	-3	3	-3		3	1	1	-2
Lodi_WFS_A	1	2	3	-3	-1	-2	2		-2	-3	2	-2		1	-1	-2	-1
Lodi_WFS_B	1	2	3	-2	-2	-1	3		3	1	3	-2		2	2	1	-1
Chant_Real_vorn	3	1	3	1	-3	3	-3	3	3	-1	3	-3	3	2	3	2	3
Chant_Real_hinten	3	-1	-1	1	-2	3	-3	3	1	-2	-1	-3	3	0	3	1	3
Chant_Real_vorn_MTB	3	3	-3	-1	-3	3	-3	3	3	-3	3	-3	3	3	3	3	3
Chant_Real_hinten_MTB	1	0	-3	3	2	2	-3	3	-3	0	-3	-3	0	-2	-1	-2	3
Chant_Mono	1	3	2	-3	-1	-1	-2	2	3	-1	2	-3	3	2	1	1	-1
Chant_AB	2	3	-3	1	-3	2	-3	-2	3	0	3	-3	3	3	3	1	-3
Chant_XY	3	3	3	-1	-2	2	1	1	-1	-1	3	-3	3	2	2	1	1
Chant_ORTF	0	3	-2	-3	-3	2	0	-1	3	0	3	-3	3	3	2	1	-2
Chant_DeccaS	1	3	3	-3	-3	1	-2	-1	3	-3	3	-3	3	3	3	3	-1
Chant_INA3S	-1	2	2	1	-2	1	-1	-1	3	-1	3	-2	3	2	1	0	-2
Chant_AB_KH	2	1	3	-2	-3	2	3	3	2	2	3	2	3	2	2	1	0
Chant_XY_KH	1	2	-1	1	1	1	3	2	2	-3	3	-1	3	3	2	0	-1
Chant_WFS_A	2	3	3	-3	-3	2	-2	3	3	-1	3	-3	3	3	3	2	-1
Chant_WFS_B	2	3	3	-3	-3	3	0	2	3	-3	3	-3	3	2	3	1	-2
Lodi_Real_vorn_REL	2	2	2	-2	-1	3	2		3	-2	3	-1		2	1	1	3
Lodi_AB_REL	-2	2	0	-3	1	-1	-2		-1	-3	3	1		2	-1	-2	-2
Chant_Real_vorn_REL	2	-1	1	2	-3	3	-2	2	-1	-3	2	-3	3	2	2	3	3
Chant_XY_REL	3	3	3	-1	-3	3	2	-1	3	-3	3	-3	3	3	1	0	1

[truncated: 8 more sheets: P 11, P12, P 13, P 14, P 15, P 16, P 17, P 18]
