# Supplementary material for: Capturing differences in perception and aesthetic judgment of live or medially presented music: development of a self-report instrument
Source: Front Psychol. 2024 Apr 2;15:1339168. doi: 10.3389/fpsyg.2024.1339168 (PMC11018976; doi:10.3389/fpsyg.2024.1339168)
Supplement: Supplementary file 2 [file Table_2.XLSX]

## Sheet: Tabelle1
Participant	German original	English translation
P1	klingt räumlicher - Mono	sounds more spatial - Mono
	Im Kopf-Lokalisation - Externalisiert	In head localization - Externalized
	Räumlicher (Klang der Musiker) - nicht-räumlich	Spatial (sound of the musicians) - non-spatial
	Kein Hall - mit Hall	No reverb - with reverb
	Einzelne Quelle (z.B. Instrument) dreht sich mit Kopfbeweung mit - Gesamtklang konsistent (alle Quellen verhalten sich gleich)	Single source (e.g. instrument) rotates with head movement - Overall sound consistent (all sources behave the same)
	Nasal - breitbanding	Nasal - broadbanding
	leise - laut	quiet - loud
	Klingt nach Stereo - klingt nach 3D Sound (wie mehrere Lautsprecher	Sounds like stereo - sounds like 3D sound (like several loudspeakers)
	Unvolle Klangfarbe - voller Klang	Full timbre - full sound
	Direkter Klang - umgebender Klang	Direct sound - ambient sound
	Zu hören und zu sehen: Musiker spielen in einem Raum - Zu hören und zu sehen: Aufnahme kommst aus Lautsprecher	To hear and to see: Musicians playing in a room - To hear and see: Recording coming out of speakers
	Bild: Konzertbühne - Lautsprecher statt Konzertbühne	Image: Concert stage - Loudspeaker instead of concert stage
P2	Lauter - leiser	Louder - quieter
	Zu leise. Höranstrengung steigt - angemessen laut	Too quiet. Listening effort increases - appropriately loud
	Bearbeitet - natürlich	Processed - natural
	Klangzentriert (kommt alles aus einer Richtung) - Klangpanorama (kommt hörbar aus versch. Richtungen)	Sound-centered (everything comes from one direction) - Sound panorama (comes audibly from different directions)
	Steril (Klang) - natürliche Umgebungsgeräusche	Sterile (sound) - natural ambient noise
	Tiefpassgefiltert - spektral vollständig - ausgeglichen	Low-pass filtered - spectrally complete - balanced
	Solistin präsent in Vordergrund (akustisch) - Ensemblespiel	Soloist present in the foreground (acoustic) - Ensemble playing
	Symbiotisches Klanggefüge - einzelne Stimmen gut raushörbar	Symbiotic sound structure - individual voices clearly audible
	Mehr Bassanteil - weniger Bassanteil	More bass - less bass
	Klang von vorn - Klang umgebend, umhüllt	Sound from the front - sound surrounding, enveloping
	Klang dünn - Klang voll	Thin sound - full sound
	Direkter, umittelbarer Klang - indirekter Klang	Direct, indirect sound - indirect sound
	Komprimierte Dynamik des Klangs - natürliche Dynamik des Klangs	Compressed dynamics of the sound - natural dynamics of the sound
	Blechern, schrill (vor allem die Sängerin) - nicht blechern, nicht schrill	Tinny, shrill (especially the singer) - not tinny, not shrill
	Bilddramaturgie weckt dann nicht erfüllte Erwartungen - ohne Bilddramaturgie keine Erwartungen	Image dramaturgy raises unfulfilled expectations - no expectations without image dramaturgy
	Aufmerksamkeit ungelenkt - Bild lenkt Aufmerksamkeit des Hörens	Attention undirected - image directs the listener's attention
	Langweilig - klanglich reizvoll	Boring - tonally appealing
	Privat. Sofagefühl (Allg. Zustand) - öffentlich (Allg. Zustand)	Private. Sofa feeling (general condition) - public (general condition)
	Livepräsentation - Bildschirmpräsentation	Live presentation - screen presentation
	Klang/Bild weiter entfernt - Klang/Bild dicht	Sound/image further away - Sound/image close
	Klangquellenort: Bild/Ton übereinstimmend erwt.gm - Klangquellenort: Bild/Ton auseinander tlw. Irritierender	Sound source location: image/sound matching erwt.gm - Sound source location: image/sound apart partly irritating
	Interaktionen des Ensembles nicht sichtbar - Interaktionen des Ensembles sichtbar	Interactions of the ensemble not visible - Interactions of the ensemble visible
	Helles Tageslicht (Live-Bühne) - warmes Lampenlicht (Video-Bühne)	Bright daylight (live stage) - warm lamp light (video stage)
P3	Klingt näher - klingt entfernter	Sounds closer - sounds more distant
	Klingt wärmer - klingt neutraler	Sounds warmer - sounds more neutral
	klingt verschleierter - klingt konturierter	sounds more obscure - sounds more contoured
	klingt nach engerem Raum - Klingt nach weiterem Raum	sounds like a narrower space - sounds like a wider space
	Klingt leiser - klingt lauter	Sounds quieter - sounds louder
	Größere Präsenz des tiefen Spektrums - Geringere Präsenz des tiefen Spektrums	Greater presence of the deep spectrum - Less presence of the deep spectrum
	Klingt kofferradiohaft - klingt weniger kofferradiohaft	sounds like a portable radio - Sounds like a portable radio
	Klingt authentischer (realitätsnah) - klingt weniger authentisch (realitätsnah)	Sounds more authentic (close to reality) - sounds less authentic (close to reality)
	klingt spektral dissoziierter - klingt spektral integrierter	sounds more spectrally dissociated - sounds more spectrally integrated
	klingt unverzerrt - Klingt verzerrt (Ohasing, Übersteuerung höherer F.)	sounds undistorted - sounds distorted (ohasing, overdriving higher frequencies)
	klingt lebendig - klingt weniger lebendig	sounds lively - sounds less lively
	Enges Stereopanorama - Weites Stereopanorama	Narrow stereo panorama - Wide stereo panorama
	Klingt trocken - klingt hallig	Sounds dry - Sounds reverberant
	Ensemble klingt näher, Stimme entfernter - Ensemble klingt entfernter, Stimme näher	Ensemble sounds closer, voice more distant - Ensemble sounds more distant, voice closer
	Klingt körperloser - klingt körperhafter	Sounds more disembodied - sounds more physical
	klingt verschwenderisch - klingt kontrolliert	Sounds wasteful - sounds controlled
	Instrumente schlecht ortbar - Instrumente gut ortbar	Instruments difficult to locate - instruments easy to locate
	Klingt weich - klingt rau	Sounds soft - sounds rough
	Geringe Tiefenstaffelung - Höhere Tiefenstaffelung	Less depth - more depth
	Klingt indirekt - klingt direkt	Sounds indirect - sounds direct
	Klingt angenehm - klingt unangenehm	Sounds pleasant - sounds unpleasant
P4	Räumlich flacher Klang - räumlich präsenter	Spatially flat sound - spatially more present
	Klanglich schräbbelig - voller Klang	Scratching sound - full sound
	Lauter - leiser	Louder - quieter
	Klangliche Katastrophe - klanglich gut	Disastrous sound - good sound
	Schräbbelig - mehr Bässe	Scratchy - more bass
	Natürlich - künstlich	Natural - artificial
	Gefiltert/ ohne Bässe - natürliche Klanggebung	Filtered/ without bass - natural sound
	Stimme im Vordergrund - Stimme hebt sich nicht ab	Voice in the foreground - voice does not stand out
	Räumliche Tiefe - räumliche Breite d. gesamten Klangbilds	Spatial depth - spatial width of the overall sound image
	Schlechte Textverständlichkeit - gute Textverständlichkeit	Bad text intelligibility - good text intelligibility
	Eigenartiger Klick bei Gesangsbeginn (Mikrophon?) - ungestörter Einsatz der Stimme	Strange click at the beginning of vocals (microphone?) - undisturbed use of the voice
	Entfernt (Klang) - nah	Distant (sound) - close
	Angenehme mittlere Räumlichkeit - zu nah/zu entfernt	Pleasant medium spatiality - too close/too distant
	Einigermaßen natürlich - weltmeisterschaft im gepressten Klangbild	Reasonably natural - world championship in the pressed sound image
	Hallig - trocken	Reverberant - dry
	Stimme leicht links - mittig	Voice slightly left - centered
	Linkslastig - mittitges ausgewogenes Klangbild	Left-heavy - centered balanced sound image
	Enges Panorama (räumlich, flach), klingt wie Mono - natürliches Panorama	Narrow panorama (spatial, flat), sounds like mono - natural panorama
	Aggressiv, hart, evt. Etwas mehr Höhen, technische Ursache - sanft im Gesamtklang, technische Ursache	Aggressive, harsh, possibly slightly more treble, technical cause - Smooth overall sound, technical cause
	Ausgewogenes Gesamtklangbild - gepresst bzw. unausgewogenes Klangbild	Balanced overall sound image - pressed or unbalanced sound image
	Angenehme Rezeptionsdistanz - zu nah am Ohr	Comfortable reception distance - too close to the ear
	Größeres Panorama, angenehme Entfernung enges Panorama, zu nah	Larger panorama, comfortable distance Narrow panorama, too close
	Entfernt (Klang und Bild) - nah, präsent	Distant (sound and image) - close, present
	Höre Stereobild, sehe 1 Lautsprecher - Bild und Klang kongruent	Hear stereo image, see 1 loudspeaker - image and sound congruent
	Zuordnung Klang zu Bild (Klang scheint von Bild zu kommen) - Klang kommt aus dem Kopfhörer	Assignment of sound to image (sound seems to come from image) - sound comes from the headphones
	Konzertsituation (räumlich) - typische CD-Aufnahme	Concert situation (spatial) - typical CD recording
P5	Eindimensionaler Klang - mehrdimensionaler Klang (räumlich)	One-dimensional sound - multidimensional sound (spatial)
	Klang flach und dünn (ohne Tiefen) - voluminöser Klang, ausgewogenes Frequenzbild	Sound flat and thin (without bass) - voluminous sound, balanced frequency image
	Gesangsstimme im Zentrum meines Kopfes - Gesang nicht akustisch zu orten	Vocals in the center of my head - vocals cannot be located acoustically
	Gesang unterrepräsentiert - Gesang überrepräsentiert	Vocals under-represented - Vocals over-represented
	Zu enge Stereoanordnung - weites Stereobild	Stereo arrangement too narrow - wide stereo image
	Stimme geht völlig unter - erkennbare Stimme	Voice gets completely lost - recognizable voice
	Höhlenakustik - kontrollierter Nachhall	Cave acoustics - controlled reverberation
	Mehr Schärfe (mehr Höhen) - mehr Wärme akustisch	More sharpness (more highs) - more warmth acoustically
	Offener Klang (weites Stereobild) - enge Klangperspektive	Open sound (wide stereo image) - narrow sound perspective
	Mono - stereo oder räumlich	Mono - stereo or spatial
	Sehr durchsichtig und klare Positionierung - mulmig	Very transparent and clear positioning - queasy
	Eindruck fehlender Bässe - Ausgewogenes Frequenzbild	Impression of missing bass - Balanced frequency image
	Gesang geht direkt in die Seele (emotionalisierend) - gefühlsneutral	Vocals go straight to the soul (emotionalizing) - emotionally neutral
	Angenehmer Gesamtklang - unangenehmer Klang	Pleasant overall sound - unpleasant sound
	Dreidimensionales Bild, Tiefe akustisch und optisch - flach Bild und Ton	Three-dimensional picture, depth acoustically and optically - flat picture and sound
	Sendebild akustisch und optisch über Fernsehen - Konzerterlebnis	Broadcast image acoustically and optically via television - concert experience
	Ausgewogener Klang, Sendebild (geschnitten) - Konzerterlebnis	Balanced sound, broadcast picture (edited) - concert experience
	Konzertmitschnitt (Bild) - Live	Concert recording (picture) - Live
	Klang entspricht den positionierten Lautsprechern - akustisch eng	Sound corresponds to the positioned loudspeakers - acoustically narrow
	Mischung ist bildbezogen - rein akustische Mischung (Tonträgermischung)	Mix is image-related - purely acoustic mix (sound carrier mix)
	Akustische Position passt zum Bild - Positionierung der Instrumente passt nicht	Acoustic position matches the image - positioning of instruments does not match
	Gesang akustisch entfernter als optisch - Gesang im Vordergrund	Vocals acoustically more distant than visually - Vocals in the foreground
	Musiker wirken sehr verloren optisch und akustisch - angemessen Darstellung der Künstler	Musicians appear very lost visually and acoustically - appropriate representation of the artists
	Zu viel Hall für Bildeindruck - zu wenig Hall bezogen aufs Bild	Too much reverb for image impression - too little reverb in relation to the image
	Extrem weiter Bildwinkel - ausgewogenes Bild	Extremely wide picture angle - balanced picture
	Bild in artifizieller Umgebung - natürliche Umgebung	Image in artificial surroundings - natural surroundings
	Feste Perspektive (Totale) - geschnittene Bildfolge	Fixed perspective (long shot) - cutted image sequence
	Gelblicher Farbton (Kunstlichtumgebung) - Tageslichtbeleuchtung (bläulich)	Yellowish hue (artificial lighting environment) - daylight lighting (bluish)
	Rotes Kleid sticht hervor gegen schwarzen Hintergrund - farblich gleichförmig	Red dress stands out against black background - uniform in color
	Optisch schwarz vorherrschend - bunt	Optically black predominant - colorful
P6	Voller Klang (mehr Raumklang) - Flacher Klang	Full sound (more spatial sound) - Flat sound
	Hellerer Klang - Natürlicher Klang	Brighter sound - Natural sound
	Klingt leicht übersteuert - Korrekte Aussteuerung	Sounds slightly overdriven - Correct level control
	Leiser - Lauter	Quieter - Louder
	Ohne Tiefe, nicht in den Raum greifend - Voluminöser, umgreifend vom Zuhörer aus gesehen	Without depth, not reaching into the room - More voluminous, encompassing from the listener's perspective
	Klang wie Monoaufnahme - Stereo	Sounded like a mono recording - Stereo
	Sängerin war in meinem Kopf - Sängerin vor mir	Singer was in my head - Singer in front of me
	Breiter Klang - Schmaler und näher am Zuhörer	Wider sound - Narrower and closer to the listener
	Hellerer Klang - Dunklerer Klang	Brighter sound - Darker sound
	Fehlende Mitten - Vollständiger Klang	Missing mids - Fuller sound
	Stimme im Einklang mit dem Orchester - Stimme herausgehoben	Voice in harmony with the orchestra - Voice emphasized
	Schleier über der Musik - Klarer Klang	Veil over the music - Clear sound
	Klang um mich herum auch von links und rechts - Klang hauptsächlich vor mir. Weniger raumgreifend	Sound around me also from left and right - Sound mainly in front of me. Less expansive
	Höhere Präsenz der Sängerin im Raum (tritt hervor) - Orchester und Sängerin auf einer Ebene	Greater presence of the singer in the room (stands out) - Orchestra and singer on the same level
	Klang und Orchester (Bild) weit entfernt vom Zuhörer - Beides näher am Zuhörer	Sound and orchestra (image) far away from the listener - Both closer to the listener
	Angenehmeres Musikempfinden durch Bild - Lautsprecheransicht zu technisch (Ablenkung von Musik)	More pleasant musical experience through image - loudspeaker view too technical (distraction from music)
P7	Natürlicher Klang - nachbearbeiteter Klang	Natural sound - post-processed sound
	Viel Hall - wenig Hall	Lots of reverb - little reverb
	Lauter - leiser	Louder - quieter
	Bauchiger Klang - linearer Klang (direkt)	Bellied sound - linear sound (direct)
	Ausgetrocknet - voluminös/ödenatös/substanzhaltig	Dried out - voluminous/odd/substantial
	Schrill - weich	Shrill - soft
	Hohe Instrumente kommen stärker raus - tiefe Instrumente kommen stärker raus	High instruments come out stronger - Low instruments come out stronger
	Schlechte Balance Begleitung/Gesang - gute Balance Begleitung/Gesang	Poor balance accompaniment/vocals - good balance accompaniment/vocals
	Begleitung störend - Begleitung unterstützend	Disturbing accompaniment - supportive accompaniment
	Dramatisch - steril	Dramatic - sterile
	Klang einer leichten Bogenführung - Klang einer steifen/gedrückten Bogenführung	Sound of light bowing - sound of stiff/pressed bowing
	Spielnebengeraeusche (Kratzen) vorhanden - Spielnebengeräusche nicht vorhanden	Playing background noises (scratching) present - Playing background noises not present
	Stimme ändert Distanz mit Tonhöhe (tief-weit, hoch-nah) - Stimme bleibt gleich entfernt	Voice changes distance with pitch (low-wide, high-close) - Voice remains at the same distance
	Artikulation schlechter hörbar - Artikulation gut hörbar	Articulation less audible - Articulation clearly audible
	Weit entfernt - nah	Far away - close
	Verfremdet (schlechtes Radio) - authentisch (gutes Radio)	Alienated (bad radio) - authentic (good radio)
	Metallisch - seidig	Metallic - silky
	Flach, ohne Schwingungen - nicht flach, mit Schwingungen	Flat, without vibrations - not flat, with vibrations
	Stimme leiser als Begleitung - Stimme lauter als Begleitung	Voice softer than accompaniment - Voice louder than accompaniment
	Lautstärke Stimme=Begleitung > Gegenstimme - Lautstärke Stimme = Begleitung = Gegenstimme	Volume of voice = accompaniment > counter voice - Volume of voice = accompaniment = counter voice
	Unterkühlter Klangeindruck/unwohl - warmer Klangeindruck/angenehm	Undercooled sound impression/uncomfortable - warm sound impression/pleasant
	Ambiente wie großes Konzert - Ambiente wie Probedurchlauf (+anderer Raum?)	Ambience like big concert - ambience like rehearsal (+other room?)
P8	Klingt nach größerem Raum - kleinerer Raum	Sounds like a larger room - smaller room
	Es klingt höhlenartig und hallt - hallt nicht	It sounds cavernous and reverberates - does not reverberate
	Instrumente auf Bühne in weiterem Bogen platziert - stehen enger zusammen	Instruments on stage placed in a wider arc - stand closer together
	Klang kommt von vorn, wie mono - Klang kommt von oben und rundherum, wie Stereo	Sound comes from the front, like mono - Sound comes from above and all around, like stereo
	Klang ist heller, Bässe schwächer - Klang ist dunkler, Bässe stärker	Sound is brighter, basses weaker - Sound is darker, basses stronger
	Musik spielt im Kopf - Musik spielt im Ruam	Music plays in the head - Music plays in the room
	Bei Kopfbewegung bewegt sich Musik mit - bei Bewegung bleibt Musik auf der Stelle	When you move your head, the music moves with you - when you move, the music stays in place
	Vor Beginn Geräusche: Plattennadel, Saalgeräusche - keine Vorgeräusche	Noises before the start: record needle, hall noises - no background noises
	Musik kommt on rechts vorne - Musik kommt zentral von vorn	Music comes from the front right - music comes from the front center
	Musikquelle ist weiter entfernt - Musikquelle ist nahe	Music source is further away - music source is close
	Musik ist leiser - Musik ist lauter	Music is quieter - music is louder
	Violinen sitzen rechts, Celli links - Violinen links, Tiefe Streicher rechts	Violins sit on the right, cellos on the left - Violins on the left, low strings on the right
	Studioaufnahme ohne Nebengeräusche - Livemitschnitt mit Nebengeräuschen	Studio recording without background noise - Live recording with background noise
	Nur Stimme klingt weiter entfernt - nur Stimme klingt näher	Only voice sounds further away - only voice sounds closer
	Der Klang ist voller, bessere Lautsprecher - klingt blechern wie aus schlechteren Lautsprechern	The sound is fuller, better loudspeakers - sounds tinny as from poorer loudspeakers
	Klang ist räumlich flacher - Klang ist räumlich tiefer	Sound is spatially flatter - sound is spatially deeper
	Musik kommt von vorne - Musik kommt von hinten	Music comes from the front - Music comes from the back
	Ich sitze mitten im Orchester - ich sitze außerhalb vom Orchester	I'm sitting in the middle of the orchestra - I'm sitting outside the orchestra
P9	Klingt wie Studioaufnahme - klingt wie Livekonzertaufnahme	Sounds like a studio recording - sounds like a live concert recording
	Synthetischer/Studiohall - "echter" Raumhall	Synthetic/studio reverb - "real" room reverb
	Klingt nah - Klingt weiter weg und klanglich verwischter	Sounds close - Sounds further away and more blurred in sound
	Saiten-/Instr.geräusche/Instrumente gut zu unterscheiden - Saiten-/Instr.ger.Instrumente nicht so gut zu unterscheiden	Strings/instrument noises/instruments easy to distinguish - Strings/instrument noises/instruments not so easy to distinguish
	Weniger hohe Frequenzen - mehr hohe Frequenzen	Less high frequencies - more high frequencies
	Klingt organisch/natürlich - klingt elektrisch/künstlich	Sounds organic/natural - sounds electric/artificial
	Sängerin klingt näher als Streicher - Sängerin auf gleicher Ebene	Vocalist sounds closer than strings - Vocalist on the same level
	Sängerin klingt nicht so kraftvoll/abgemischt - Sängerin klingt kraftvoll/abgemischt	Vocalist doesn't sound as powerful/mixed - Vocalist sounds powerful/mixed
	Hat unnatürlich viele Höhen - haben normal viele Höhen	Has an unnatural amount of highs - has a normal amount of highs
	Klingt kälter (weniger Tiefen, mehr Höhen) - klingt wärmer (alle Frequenzen da)	Sounds colder (less bass, more highs) - sounds warmer (all frequencies there)
	Balance der Instrumente nicht ausgeglichen (Lautstärke) - Balance gut ausgeglichen	Balance of instruments not balanced (volume) - balance well balanced
	Sängerin kaum hörbar - Sängerin gut hörber	Singer barely audible - Singer easy to hear
	Stimme klingt variabler/interessanter - Stimme klingt invarianter/flacher	Voice sounds more variable/interesting - Voice sounds more invariant/flatter
	Aufnahme klingt überzeugend wie im Konzertsaal - Aufnahme klingt synthtisch nach Studio	Recording sounds convincing like in a concert hall - Recording sounds synthesized like a studio
	Aufgelöster, klarer, weiterer Klang - "Badezimmersound"	Resolved, clear, wider sound - "bathroom sound"
	Keine Dynamikkompression - Hörbare Dynamikkompression	No dynamic compression - audible dynamic compression
	Keine lokalen Frequenzpeaks - lokale Frequenzpeaks	No local frequency peaks - local frequency peaks
	Man glaubt mehr Musiker zu hören als da sind - man hört die Originalbesetzung exakt	You think you hear more musicians than there are - you hear the original line-up exactly
	Streicher halten sich hinter Solistin zurück - Streicher spielen sehr dynamisch	Strings hold back behind soloist - Strings play very dynamically
	Stimme klingt unangenehm quietischig - Stimme klingt schön	Voice sounds unpleasantly squeaky - Voice sounds beautiful
	Führt zu angenehmen (beruhigenden) Hörerlebnis - hektisches Hörerlebnis	Leads to a pleasant (calming) listening experience - hectic listening experience
	Mehr Spannung, da Publikum Atem anhält - Kein Publikum hörbar	More tension as audience holds breath - No audience audible
	Unnatürlich nah, falsches Verhältnis von Instr. und Raum - Klangverhältnis entspricht Erwartungen	Unnaturally close, wrong ratio of instruments and space - Sound ratio meets expectations
	Ton passt nicht so gut zum Bild - Ton passt gut zum Bild	Sound does not match the image so well - Sound matches the image well
	Wirkt mehr wie eine Monoaufnahme (Ton & Bild) - wirkt eher wie Stereo (Ton & Bild)	Seems more like a mono recording (sound & picture) - Seems more like stereo (sound & picture)
	Studiomonitor (Bild) - Kammermusikraum (Bild)	Studio monitor (picture) - Chamber music room (picture)
P10	Klingt blechern - klingt warm und angenehm	Sounds tinny - sounds warm and pleasant
	Leiser - lauter	Quieter - louder
	Direkt (Klang nur nach vorne gerichtet/wie stereo) - umfassend (Klang aus versch. Richtungen/wie DolbySurr)	Direct (sound only directed to the front/like stereo) - comprehensive (sound from different directions/like DolbySurr)
	Musikalisch Figuren räumlich getrennt (dolby s.) - Gesamtbild der Musik (wie eine Masse)	Musical figures spatially separated (dolby s.) - overall picture of the music (like a mass)
	Musik wirkt größer/voluminöser (Klang) - Musik wirkt flach/nicht lebendig (Klang)	Music seems larger/more voluminous (sound) - Music seems flat/not lively (sound)
	Klingt kratzig - klingen angenehm/natürlich	Sounds scratchy - sounds pleasant/natural
	Musik scheint von vorne zu kommen - Musik scheint aus dem Kopfhörer/ von näher zu kommen	Music seems to come from the front - Music seems to come from the headphones/closer
	Sängerin im Verhältnis lauter - Musik ausgewogen	Singer in relation louder - music balanced
	Schwammig im Klang (Endungen unsauber gespielt) - klarer im Klang	vague in sound (endings played uncleanly) - clearer in sound
	Musik kommt von beiden Seiten - Musik kommt tendenziell von einer Seite	Music comes from both sides - music tends to come from one side
	Dumpfer Klang (wie hinter geschlossener Tür) - deutlicher Klang	Muffled sound (as if behind a closed door) - clearer sound
	Ensemble ausgewogen - hohe Streicher stehen im Vorderung	Ensemble balanced - high strings are in the foreground
	Sängerin leiser als Hintergrund - ausgewogen	Singer quieter than background - balanced
	Weniger Hall - gewohnheitsmäßig abgemischt	Less reverb - habitually mixed
	Klingt kalt/ eher emotionslos gespielt - klingt angenehmer/ intensiver gespielt	Sounds cold/ rather emotionless played - sounds more pleasant/ more intense played
	Klingt nicht überzeugend (Klang & Bild) - reißen mehr mit	Doesn't sound convincing (sound & picture) - more captivating
	Aufnahme - live (Bild und Klang)	Recording - live (picture and sound)
P11	klingt näher - klingt weiter weg	Sounds closer - sounds further away
	Klingt direkter - klingt diffuser	Sounds more direct - sounds more diffuse
	Stereopanorama ist enger - Stereopanorama ist breiter	Stereo panorama is narrower - Stereo panorama is wider
	Lautstärke geringer - Lautstärke höher	Volume lower - volume higher
	Weniger Bässe und tiefe Mitten - ausgewogenes Klangbild	Less bass and low mids - balanced sound image
	Mittiger Klang - Ausgewogeneres Klangbild	Centered sound - more balanced sound image
	Klingt halliger - klingt weniger hallig	Sounds more reverberant - sounds less reverberant
	Klingt wie in einem kleinen Raum - Klingt wie in einem größeren Raum	Sounds like a small room - Sounds like a larger room
	Stimme setzt sich nicht durch - Stimme präsenter	Voice does not assert itself - Voice more present
	Klingt lebendiger/offener - klingt weniger lebendig	Sounds more lively/open - sounds less lively
	Bessere akustische Ortung der Instrumente - Schlechtere akustische Ortung der Instrumente	Better acoustic localization of instruments - Poorer acoustic localization of instruments
	Klingt wie mono, Instrumente in der Mitte - breiteres Stereopanorama	Sounds like mono, instruments in the center - wider stereo panorama
	Intrumente eher links - Intrumente eher rechts	Instruments more to the left - Instruments more to the right
	Stimme sehr leise - Verhältnis Stimme und Instrumente ausgewogener	Voice very quiet - more balanced relationship between voice and instruments
	Stimme links - Stimme mittig	Voice on the left - voice in the middle
	Tiefenstaffelung der Instrumente - flachere Anordnung der Instrumente	Depth gradation of instruments - flatter arrangement of instruments
	Musik bleibt im Kopf - Musik bleibt außen an selber Stelle	Music stays in your head - music stays outside in the same place
	Farbton wirkt wärmer/gelblicher - Farbton wirkt kühler/blaulicher	Color tone appears warmer/yellowish - Color tone appears cooler/bluer
	Bild-im-Bild-Darstellung - Direktes Bild ohne Räner oder dergleichen	Picture-in-picture presentation - direct picture without edges or similar
	Zweidimensionales Bild (Fernseher) - Dreidimentsionales Bild	Two-dimensional image (television) - Three-dimensional image
	Wechselnde Kameraperspektiven - Fixe Kameraperspektiven	Changing camera angles - Fixed camera angles
	Klingt am schönsten - klingt weniger angenehm	Sounds best - sounds less pleasant
P12	Klingt hallig - klingt trocken	Sounds reverberant - Sounds dry
	Klingt eng/fokussiert (wie Mono) - klingt breit (wie Stereo)	Sounds narrow/focused (like mono) - Sounds wide (like stereo)
	Klingt weich (mehr Hall, weniger Höhen) - klingt hell (wenig/kein Hall, mehr Höhen)	Sounds soft (more reverb, less highs) - sounds bright (little/no reverb, more highs)
	Klingt hart - klingt weich	Sounds hard - sounds soft
	klingt hell - klingt dumpf	sounds bright - sounds muffled
	Klingt verwaschen - ich höre mehr Details (z.B. Bogenanstriche)	Sounds washed out - I hear more details (e.g. bowing)
	Musik kommt von "zwischen den Ohren" - Musik kommt von vorne bzgl. Sitzrichtung	Music comes from "between the ears" - music comes from the front in terms of seating direction
	Klingt voll - klingt mittig (wie Radio, beschnittenes Spektrum)	Sounds full - sounds centered (like radio, clipped spectrum)
	Sängerin ist im Vordergrund - Sängerin und Orchester sind in gleicher Entfernung	Singer is in the foreground - singer and orchestra are at the same distance
	Sängerin etwas von oben - Sängerin auf Horizontalebene	Singer slightly from above - singer on horizontal plane
	Klingt etwas nach Kammfilter - kein Kammfilter erkennbar	Sounds a bit like a comb filter - no comb filter recognizable
	Sängerin und Orch. haben gleich viel Hall - Sängerin hat weniger Hall als Orchester	Singer and orch. have the same amount of reverb - Singer has less reverb than orchestra
	Schlechte Ortbarkeit der Instrumente - Gute Ortbarkeit der Instrumente	Poor localization of the instruments - Good localization of the instruments
	Manche Instr. Bewegen sich im St.-Panorama - Instrumente bleiben am gleichen Ort	Some instruments move in the st. panorama - Instruments remain in the same place
	Orchester kommt leicht v. links bzgl. d. Sitzrichtung - Orchester kommt von vorne	Orchestra comes slightly from the left in terms of seating direction - Orchestra comes from the front
	Sängerin eher von rechts - Sängerin in der Mitte	Singer tends to come from the right - Singer in the middle
	Sängerin im Hintergrund (muss gg. Orchester ansingen) - Sängerin und Orchester lautstärkenmäßig ausgewogen	Singer in the background (has to sing against the orchestra) - Singer and orchestra balanced in terms of volume
	Orchester leicht links - Orchester leicht rechts	Orchestra slightly to the left - Orchestra slightly to the right
	Orchester räumlich nah - Orchester räumlich fern	Orchestra spatially close - Orchestra spatially distant
	Intr. Räumlich zw. Vorder- und Hintergrund verteilt - Instrumente auf gleicher Distanz	Intr. spatially distributed between foreground and background - Instruments at the same distance
	Orchester auf Horizontalebene - Orchester leicht von oben	Orchestra on horizontal plane - Orchestra slightly from above
	Intr. Räumlich in der Vertikalebene verteilt - Instrumente auf einer Höhe	Intr. spatially distributed in the vertical plane - instruments at the same pitch
	Überhöhte Tiefemitten - Abgesenkte Tiefmitten	Exaggerated low mids - Lowered low mids
	Höhere Streicher eher links - Alle Instrumente in der Mitte	Higher strings more to the left - All instruments in the center
	Tiefe Str. mehr im Vordergrund (Anstriche gut hörb.) - Alle Instrumente in derselben Distanz	Low strings more in the foreground (touches clearly audible) - All instruments at the same distance
	Badewannen-EQ (Mitten-, Höhen+, Bässe neutral) - inverser Badewannen-EQ	Bathtub EQ (mids-, highs+, bass neutral) - inverse bathtub EQ
P13	Klingt mono - räumlicher	Sounds mono - more spacious
	Klingt transparenter - klingt undurchsichtiger	Sounds more transparent - sounds more opaque
	klingt entfernter - klingt näher	Sounds more distant - sounds closer
	Klingt halliger - klingt trockener	Sounds more reverberant - sounds drier
	Klingt räumlich schmaler - klingt räumlich breiter	Sounds spatially narrower - sounds spatially wider
	Kein echter Raum - echter Raum	No real room - real room
	Klingt nach Phasenfehler - klingt phasenrichtig	Sounds like a phase error - sounds in phase
	Sängerin schelcht zu hören - Sängerin gut zu hören	Singer difficult to hear - Singer easy to hear
	Sängerin im Kopf - Sängerin vorn	Singer in the head - singer in the front
	Nicht natürliche Einstellung der mittigen Frequenzen - natürliche Einstellung der mittigen Frequenzen	Not natural adjustment of the mid frequencies - natural adjustment of the mid frequencies
	Klingt voller, vor allem in den Tiefen - klingt dünner, Defizite in den Tiefen	Sounds fuller, especially in the low frequencies - sounds thinner, deficits in the low frequencies
	Instrumente optimal, Sängerin nicht optimal (Klang) - Sängerin optimal, Instrumente nicht optimal (Klang)	Instruments optimal, singer not optimal (sound) - Singer optimal, instruments not optimal (sound)
	Kommt bei geschlossenen Augen von vorn oben - kommt auch bei geschlossenen Augen von vorn	Comes from the front above with eyes closed - also comes from the front with eyes closed
	Solistin und Begleitung im gleichen Raum - Solistin nicht im gleichen Raum wie Begleitung	Soloist and accompaniment in the same room - Soloist not in the same room as accompaniment
	Hat leichte Lastigkeit nach links - rechts und links ausgewogen	Has a slight weight to the left - right and left balanced
	Breit verteilt in relativer Nähe - schmal angeordnet in Ferne	Broadly distributed in relative closeness - narrowly arranged in the distance
	Gut abgemischt, aber idealisiert - schlecht abgemischt, aber wirklichkeitsnäher	Well mixed, but idealized - poorly mixed, but more realistic
	Klingt schöner - gefällt mir nicht	Sounds nicer - I don't like it
	Leichter, sich auf Stimmen zu konzentrieren - schwerer, sich auf Stimmen zu konzentrieren	Easier to focus on voices - harder to focus on voices
	Wirkt interessanter - wirkt uninteressanter	Seems more interesting - seems less interesting
	Favorit, würde ich kaufen - würde ich nicht kaufen	Favorite, I would buy - I would not buy
	Instrumente kommen von dort, wo sie zu sehen sind - Position in Ton und Bild stimmt nicht überein	Instruments come from where you can see them - Position in sound and picture doesn't match
	Wirkt wie aus Lautsprecher - Wirkt wie im Raum erlebt	Acts as if from a loudspeaker - Acts as if experienced in the room
	Flächige Darstellung vorn - dreidimensionale, räumliche Darstellung	Flat presentation at the front - three-dimensional, spatial presentation
	Unnatürliche Überbreite - natürliche Breite	Unnatural excess width - natural width
P14	Klingt nach größerer Räumlichkeit - klingt nach direkter Aufnahme	Sounds like greater spatiality - sounds like a direct recording	Klingt sehr eng, fast monaural - klingt stereophonisch breit aufgelöst	klanglich diffus, entfernt - klanglich präsenter, näher	Musikalisch am werkgetreusten - musikalisch unsaubere Aufführung	Gute stereophonische Verteilung der Instrumente - monaurale Anordnung der Instrumente	Klingt wie live aufgenommen. Wegen Räumlichkeit - klingt wie eine Studioaufnahme	Sehr intensive dynamische spielerische Interpretation - uninspirierte "technische" Interpretation	Sehr höhenlastinges, harsches Klangbild - warmes, ausgewogenes Klangbild	Klingt wie im Zuschauerraum, schlecht gepegelt - gute akustische Übertragung	Die Stimme ist kaum zu hören - die Stimme ist gleichberechtigt	Gute Aufnahme, CD-Qualität - technisch schlechte, unbefriedigende Aufnahme	Körperlose aktustische Darbietung - runde akustische Darstellung	Schwammig - bissig	Klares Klangbild - unpräzises Klangbild	Aufnahmetechnik ist dem Genre angemessen - Aufnahme schadet der Interpretation	Große unangenehme Räumlichkeit - direkte, präsente Wiedergabe	Dünner Frequenzgang-keine Tiefen-Bässe - komplexer Klangkörper	Keine räumliche Tiefe - natürliche Räumlicheit	interessante räumliche Intrumentenverteilung - keine Instrumentenverteilung	Erwirkt freudige Emotion - erwirkt keine Emotion	Klang aggressiv-dadurch unanganehmes Hören - klanglich ausgewogen-emotional positives Erlebnis	Wirkt auf mich emotional am intensivsten - erreicht mich emotional kaum	Klingt intimer - klingt mächtiger	Emotionale Nähe - emotional offener	Bewirkt intensives Zuhören - bewirkt Weghören
	Klingt sehr eng, fast monaural - klingt stereophonisch breit aufgelöst	Sounds very narrow, almost monaural - sounds stereophonically broadly resolved
	klanglich diffus, entfernt - klanglich präsenter, näher	Sound diffuse, distant - Sound more present, closer
	Musikalisch am werkgetreusten - musikalisch unsaubere Aufführung	Musically most faithful to the work - musically unclean performance
	Gute stereophonische Verteilung der Instrumente - monaurale Anordnung der Instrumente	Good stereophonic distribution of the instruments - monaural arrangement of the instruments
	Klingt wie live aufgenommen. Wegen Räumlichkeit - klingt wie eine Studioaufnahme	Sounds like a live recording. Because of spatiality - sounds like a studio recording
	Sehr intensive dynamische spielerische Interpretation - uninspirierte "technische" Interpretation	Very intense dynamic playful interpretation - uninspired "technical" interpretation
	Sehr höhenlastinges, harsches Klangbild - warmes, ausgewogenes Klangbild	Very treble-heavy, harsh sound image - warm, balanced sound image
	Klingt wie im Zuschauerraum, schlecht gepegelt - gute akustische Übertragung	Sounds like an auditorium, poorly leveled - good acoustic transmission
	Die Stimme ist kaum zu hören - die Stimme ist gleichberechtigt	The voice is barely audible - the voice is on an equal footing
	Gute Aufnahme, CD-Qualität - technisch schlechte, unbefriedigende Aufnahme	Good recording, CD quality - technically poor, unsatisfactory recording
	Körperlose aktustische Darbietung - runde akustische Darstellung	Disembodied acoustic performance - round acoustic presentation
	Schwammig - bissig	Spongy - biting
	Klares Klangbild - unpräzises Klangbild	Clear sound image - imprecise sound image
	Aufnahmetechnik ist dem Genre angemessen - Aufnahme schadet der Interpretation	Recording technique is appropriate for the genre - recording detracts from the interpretation
	Große unangenehme Räumlichkeit - direkte, präsente Wiedergabe	Great unpleasant spatiality - direct, present reproduction
	Dünner Frequenzgang-keine Tiefen-Bässe - komplexer Klangkörper	Thin frequency response-no deep bass - complex sound body
	Keine räumliche Tiefe - natürliche Räumlicheit	No spatial depth - natural spatiality
	interessante räumliche Intrumentenverteilung - keine Instrumentenverteilung	Interesting spatial instrument distribution - no instrument distribution
	Erwirkt freudige Emotion - erwirkt keine Emotion	Elicits joyful emotion - does not elicit emotion
	Klang aggressiv-dadurch unanganehmes Hören - klanglich ausgewogen-emotional positives Erlebnis	Sound aggressive-thereby unpleasant listening - balanced sound-emotionally positive experience
	Wirkt auf mich emotional am intensivsten - erreicht mich emotional kaum	Has the most intense emotional effect on me - hardly reaches me emotionally
	Klingt intimer - klingt mächtiger	Sounds more intimate - sounds more powerful
	Emotionale Nähe - emotional offener	Emotional closeness - more emotionally open
	Bewirkt intensives Zuhören - bewirkt Weghören	Causes intense listening - causes listening away
P15	Dumpf - klar	Muffled - clear
	Hat mehr Tiefen - ausbalancierte Tiefen und Höhen	Has more depth - balanced lows and highs
	Klingt wie Kühlschrank-/Badezimmer - klingt wie gut mikrofonierter Konzertsaal	Sounds like a refrigerator/bathroom - sounds like a well-miked concert hall
	Weniger Prestigeklang -auf Prestige hin konstruierte Wirkung	Less prestige sound - effect designed for prestige
	Klingt wie aus einem kaputten Autoradio - Kammermusiksaalaufnahme bei DR Kultur	Sounds like a broken car radio - chamber music hall recording on DR Kultur
	Geringe Dynamik - hohe Dynamik	Low dynamics - high dynamics
	Kein/ Kaum Hall/ reverb. - Mini-Reverb	No/ hardly any reverb/ reverb. - Mini reverb
	"natürliche" Stimme - modifizierte Stimme (Echo-Reverb-Effekt)	Natural voice - modified voice (echo reverb effect)
	Sonore, wärmere, kräftigere Stimme - "Blechdosenstimme" (filtert Tiefen raus)	Sonorous, warmer, more powerful voice - "tin can voice" (Filters out depths)
	Leiser - lauter	Quieter - louder
	Klingt wie aus größerer Distanz aufgenomen - aus näherer Distanz aufgenommen	Sounds like recorded from a greater distance - recorded from a closer distance
	Frontalsound/Sound von vorne - Kopfhörersound (von den Seiten( nah am Kopf)	Frontal sound/sound from the front - headphone sound (from the sides( close to the head)
	Stimme leiser/weniger präsent - Stimme präsenter (mehr Aufmerksamkeit auf Stimme)	Voice quieter/less present - voice more present (more attention on voice)
	Unangenehm hohe Streicher - schöne tiefe drones (Cello)	Unpleasantly high strings - beautiful low drones (cello)
	Das Orchester spielt hinter der Wand - das Orchester spielt vor der Wand	The orchestra plays behind the wall - the orchestra plays in front of the wall
	Stimme leiser als Instrumente - Stimme eher lauter als Instrumente	Voice quieter than instruments - voice rather louder than instruments
	Es fühlt sich an wie Mono/schmale Ausdehnung - hört sich an wie Stereo/Surround-Ausdehnung	It feels like mono/narrow expansion - sounds like stereo/surround expansion
	interessant - langweilig	interesting - boring
P16	Mono, Klang aus einer Richtung von vorne - Surround, Klang räumlich aus allen Richtungen	Mono, sound from one direction from the front - Surround, spatial sound from all directions
	Lauter - leiser	Louder - quieter
	Klingt klarer - klingt weniger klar	Sounds clearer - sounds less clear
	Hallig/ räumlich - weniger hallig	Reverberant/ spatial - less reverberant
	Klingt eher wie aus einer kleineren Stereoanlage - eher wie Konzertaufnahme klingen sollte	Sounds more like a smaller stereo system - should sound more like a concert recording
	Klingt weniger unmittelbar - klingt unmittelbar	Sounds less immediate - sounds immediate
	Klingt wie im Studio bearbeitet, Raum abgedämpft - klingt wie unbarbeiteter Originalton im Konzertsaal	Sounds like processed in a studio, room muffled - sounds like unprocessed original sound in a concert hall
	Höhen/Tiefen Verhältnis klingt unausgeglichener - klingt ausgeglichener	High/low ratio sounds more unbalanced - sounds more balanced
	Weniger Tiefen - ausgeglichener Klang	Less bass - more balanced sound
	Ich fühle mich emotional distanzierter - Ich fühle mich emotional involvierter	I feel more emotionally distant - I feel more emotionally involved
	Wegen Klang und Bild fühle ich mich mehr vor Ort - wegen Klang und Bild fühle ich mich mehr außen vor	I feel more on the spot because of sound and image - I feel more on the outside because of sound and image
	Ohne Husten weniger einbezogen - Husten ist super, zieht mich rein	Less involved without coughing - coughing is great, draws me in
	Bild wirkt zu klein für großen Surround-Klang - Bild und Klang passen zusammen	Picture seems too small for big surround sound - picture and sound fit together
	Bild eher statisch - Bilder eher bewegter	Picture rather static - pictures rather more moving
	Bild eher zurückgenommen - Bild eher unterhaltsamer	Picture more withdrawn - picture more entertaining
	Wirkt wie Kamera dicht dran - wirkt wie Kamera weit weg	Looks like camera close up - looks like camera far away
	Kleinerer Bildausschnitt - größerer Bildausschnitt	Smaller shot sizie - larger shot size
P17	Richtung eng von vorn - breiter	Direction narrow from the front - wider
	Spektrum geringer (Höhen/Tiefen beschnitten) - größeres Spektrum	Spectrum narrower (highs/lows cropped) - wider spectrum
	Stimmführende Instrumente in Vordergrund - alle Instrumente gleichwertig	Vocal instruments in the foreground - all instruments of equal value
	Es fehlen willkürliche Frequenzbereiche - alle Frequenzbereiche vorhanden	Arbitrary frequency ranges missing - all frequency ranges present
	Weniger Hall - mehr Hall	Less reverb - more reverb
	Indirekt/wie durch eine Tür - direkt	Indirect/as if through a door - direct
	Cello leiser als Rest des Ensembles - Cello lauter, angemessen	Cello quieter than the rest of the ensemble - Cello louder, appropriate
	Klangbild bewegt sich mit meinem Kopf - Klangbild konstant räumlich ortbar	Sound image moves with my head - Sound image constantly spatially locatable
	Stimme im Vordergrund - Stimme im Hintergrund	Voice in the foreground - voice in the background
	Kleinder gedämpfter Raum - größerer, anderer Raum	Small, muted room - larger, different room
	Nasaler Klang (hohe Streicher) - offener Klang	Nasal sound (high strings) - open sound
	Präzise Positionen der Klangquellen - auswandernde Positionen bei Kopfbewegung	Precise positions of the sound sources - wandering positions when moving the head
	Größere Dynamik - geringere Dynamik	Higher dynamics - lower dynamics
	Linkslastig - ausgewogen	Leftist - balanced
	Stimmen mit präzisem Ort, wirkt isoliert - Ensemblewirkung	Voices with precise location, seems isolated - ensemble effect
P18	Lauter - leiser	Louder - quieter
	Hallig - trocken	Reverberant - dry
	Klangliche Präsenz - undeutlich/ verwaschen	Sound presence - indistinct/ washed out
	Entfernter vom Geschehen - fast so wie mitten drin	More distant from the action - almost like being in the middle of it
	Weich, voll, mehr Obertöne - weniger weich, weniger voll, weniger Obertöne	Soft, full, more overtones - less soft, less full, fewer overtones
	Homogenes Ensemblespiel - Bratsche & Cello manchmal etwas zu laut	Homogeneous ensemble playing - viola & cello sometimes a little too loud
	Interessante Gegenstimmenführung der Geige - interessante Gegenstimmenführung der Bratsche	Interesting counter-voicing of the violin - interesting counter-voicing of the viola
	Sängerin zu leise, Instrument zu laut - ausgewogener	Singer too quiet, instrument too loud - more balanced
	Rhythmik im Zusammenspiel wirkt weniger akkurat - Zusammenspiel wirkt präziser	Rhythm in ensemble playing seems less accurate - ensemble playing seems more precise
	Angenehmer - unangenehmer	More pleasant - less pleasant
	Emotional nicht ansprechend - berührend	Not emotionally appealing - touching
	Gemütlich - spannungsvoller	Comfortable - more exciting
	Nebenbei hören, Hintergrundmusik - aufmerksamer zuhören	Listening in passing, background music - listen more attentively
	Bildeindruck wie zu Hause auf der Couch - Bild wirkt wie im Konzertsaal	Picture impression like at home on the couch - picture looks like in a concert hall
	Optisch ansprechender/interessanter - optisch weniger interessant	Visually more appealing/interesting - visually less interesting
	Bild zu Beginn etwas übertriebene Gestick (Sängerin) - weniger auffällige Gestik	Image slightly exaggerated gestures at the beginning (singer) - less conspicuous gestures
	Ausstrahlung/Involviertheit der Musiker - Musiker etwas zurückhaltender	Charisma/involvement of the musicians - musicians slightly more reserved
