# Supplementary material for: Capturing differences in perception and aesthetic judgment of live or medially presented music: development of a self-report instrument
Source: Front Psychol. 2024 Apr 2;15:1339168. doi: 10.3389/fpsyg.2024.1339168 (PMC11018976; doi:10.3389/fpsyg.2024.1339168)
Supplement: Supplementary file 3 [file Table_3.XLSX]

## Sheet: Tabelle1
	Stimulus 1
Participant number	Musizierende unterschiedlich weit entfernt – Musizierende in gleicher Entfernung	Stimmen nicht ausgeglichen – gute Balance der Stimmen	Einzelne (Instrumental-)Stimme(n) im Vordergrund – Einzelne (Instrumental-)Stimme(n) im Hintergrund	Hauptstimme überrepräsentiert – Hauptstimme unterrepräsentiert	Mono – Stereo/Surround	Trocken – Hallig	Schmales Panorama – Breites Panorama	Kleiner Raum - Großer Raum	Instrumente schlecht zu orten – Instrumente gut zu orten	Transparent - Undurchsichtig	Geringe Tiefenstaffelung - Große Tiefenstaffelung	Laut – Leise	Nah –Entfernt	Bearbeitet – Natürlich	Authentisch – Künstlich	Steril – Voll Leben	Klang von links – Klang von rechts	Musik spielt im Kopf – Musik spielt im Raum	Klang von oben – Klang von unten	Kontrolliert – Unbändig	Leblos – Lebhaft	Uninspiriert – Geistvoll	Leicht – Angestrengt	Dünner Klang – Voller Klang	Frequenzen nicht ausgeglichen – Frequenzen ausgeglichen	Kalt – Warm	Hart – Weich	Hell – Dunkel	Tiefen dominieren – Höhen dominieren	Schrill - Sonor	CD-Qualität – Amateuraufnahme	Kofferradioklang – Guter Klang	Nicht blechern – Blechern	Kaltes Licht – Warmes Licht	Bläuliche Farben – Gelbliche Farben	Farblich abwechslungsreich – Farblich gleichförmig	Zurückhaltende Gestik – Übertriebene Gestik	Statisches Bild - Bewegtes Bild	Bild zurückgenommen – Bild unterhaltsam	Künstliche Umgebung – Natürliche Umgebung	Involvierte Ausstrahlung der MusikerInnen - MusikerInnen wirken distanziert	MusikerInnen wirken verloren – Angemessene Darstellung der MusikerInnen	Interaktionen gut sichtbar – Interaktionen schlecht sichtbar	Kleiner Bildausschnitt – Großer Bildausschnitt	Entfernt – Nah	Klangliche Mischung ist bildbezogen – Klangliche Mischung lässt Bild außen vor	Durch Bild erzeugte Erwartungen werden erfüllt – Durch Bild erzeugte Erwartungen werden nicht erfüllt	Man glaubt mehr Musiker zu hören als da sind – Man hört die Originalbesetzung exakt	Zusammenspiel von Bild und Ton verwirrt – Zusammenspiel von Bild und Ton ist hilfreich
0	6	3	3	3	1	4	2	5	1	4	1	3	3	2	3	3	3	4	3	3	4	3	2	3	4	3	3	3	3	3	5	3	3	3	3	4	3	4	2	4	1	5	1	6	3	3	2	5	3
1	5	4	2	3	4	5	4	4	6	1	4	2	0	6	1	5		5		2	5	5	2	5	5	5	3	2	4	3	0	5	1	4	4	5	4	2	5	5	1	4	0	5	5	0	0	5	6
3	5	5	2	3	4	1	1	4	2	3	4	1	2	4	2	5		5		2	5	2	3	3	5	3	5	3	3	4	1	3	1	1		5	1	1	0	1	5	5	5	2	5		6	1	1
4	4	3	3	3	2	4	3	3	4	2		2	2	4	2	4	4	4	4	3	4	4	4	3	2	4	2	4	1	3	4	4	1	3	4	4	3	1	1	3	2	4	1	4	1	1	5	4	4
5
6	6	6	2	3	6	5	5	6	6	1	5	1	1	5	0	6	3	5	3	5	6	6	1	6	6	5	5	4	2	4	0	6	0	5	5	4	4	5	6	5	0	6	0	6	1	6	0	6	6
7	2	5	2	2	4	4	6	4	2	5		5	2	5	1	5	1	5	3	4	4	4	2	5		4	2	2	5	3	1	5	1	5	5	2	5	4	2	4	4	2	2	6	3	5	3	5	4
8	5	5	3	3	5	4	4	5	5	2	4	2	2	4	2	5	3	2	3	3	5	5	1	5	4	4	4	4	3	4	2	5	1	4	4	5	2	0	2	4	1	5	5	2	5	1	1	5	5
9	5	3	3	3	3	4		4	5	0		3	3	4	3	4	3	4	3	3	4	4	4	4	3	3	1	3	3	3	1	4	4	1	1	6	3	0	0	2	1	5	1	5	3	1	1	5	6
10	6	4	3		4	4		4	4	2		5	1	4	2	4	3	5	3	2	4	4	4	5	4	3	2	3	4	2	2	3	4	1	5	6	0	1	1	5	2	2	3	4	5	1	1	4	6
11	5	6	3	3		4	2	4	3	1		3	3	6	0	5	3	2	3	0	5	5	3	6		5	4	3	3	3	2	6	0	3	5	4	5	5	4	5	1	4	2	5	2	3	3	1	3
13	1	2	1	1	4	2	2	4	4	1	2	1	2	4	1	4	3	4	3	3	4	4	3	4	2	3	1	2	4	1	3	3	4	4	4	1	4	3	4	4	1	6	0	2	5	1	2	6	6
14	4	5	2	3	5	4	5	4	3	2	4	2	1	2	3	4	3	3	3	1	4	5	4	5	4	4	4	2	5	3	1	5	2	4	4	3	4	5	3	2	5	5	1	5	4	1	1	4	5
15		4	3	3	2	6	2	5	4	2	2	6	5	3	5	2	2	5	2	1	3	2	6	2	2	2	2	2	5	2	5	2	5	2	2	5	3	2	1	1	5	1	3	2	2	5	3	6	3
16	6	6	3	3	6	4	5	5	6	1	5	3	3	4	0	4	3	5	3	1	3	3	3	5	5	3	3	3	3	3	4	5	3	1	1	5	3	0	4	3	0	6	0	6	2	0	0	6	6
17	5	5	3	3	5	4	5	4	6	4	3	2	1	5	1	5	3	4	3	4	2	5	1	6	5	4	3	3	3	4	1	6	1	1	2	4	1	1	1	2	2	5	4	5	3	5	3	5	5
18	4	5	3	3	3	4	3	5	4	2	2	2	3	2	4	3	2	4	1	3	3	4	2	4	5	4	4	2	4	4	2	5	3	1	3	4	2	0	2	1	5	2	6	5	1	4	4	5	3
19	5	1	3	2	5	4	5	4	2	5	4	2	1	2	1	4	3	1		2	5	4	2	5	5	5	4	1	5	5	1	5	1	3	1	6	1	0	0	3	1	5	1	5	4	1	2	4	4
20	6	5	0	3		2	5	2	4			3	1		1	5	3	4	2	2	5	5	1	5	6	4	3	1	3		0	5	0	5	5	4	4	4	3	2	2	4	0	6	4	1	0	6	5
22	6	3	3	3	2	6	2	5	2	4	2	3	2	5	2	5	3	5	3	4	5	3	2	4	3	4	2	1	4	3	4	3	3	4	4	6	1	0	1	4	2	4	0	4	2	4	2	5	3
23	2	6	3		5	4	6	4	6	4	5	3	2	4	2	4	3	3	3	3	5	4	2	5	3	4	4	3	3	4	1	5	1	4	4	2	3	6	5	2	0	5	2	6	2	2	2	5	5
24	3	4	4	3	4	5	2	6	4	2	2	2	4	4	2	2	4	4	2	1	4	4	4	2	4	2	2	2	4	2	4	4	4	1	4	2	4	2	0	0	6	1	4	4	1	1	0	6	4
25	5	4	2	2	5	5	5	4	5	0	5	1	1	2	1	5	2	5	3	4	4	4	2	4	5	4	3	2	4	1	1	4	1	5	3	5	4	4	3	2	2	6	1	6	5	0	6	1	0
26	4	5	2	3	4	4	4	4	5	1	5	2	2	5	1	5	3	4	3	5	5	5	2	5	5	4	4	4	3	3	1	5	1	0	3	6	1	0	1	0	2	0	1	5	1	5	2	5	5
27	0		0		0	6	6	5	0	5	5	0	0	6	0	6	3	6	0	0	0	6	3	6	4	6	3	6	0	3	3	6	6	6	4	6	0	6	5	4	0	6	0	6	6	0	0	0	6
28	6	6	5	3	4	4	5	4	4	0	2	2	2	4	2	2	3	2	3	2	2	2	1	4	5	2	4	1	3	3	1	5	3	4	5	4	2	5	2	5	2	6	1	5	3	2	0	5	4
29	5	5			5	4	5	4	2	5	5	3	1	5	1	5	3	5	3	2	5	5	2	6	6	6	5	4	3	5	1	6	1	1	1	5	3	2	1	2	5	6	2	5	5	2	1	2	5
30	3				2	4		4	2	5	1	2	4	2	4	3	2	2	3	2	2	3	4	2	2	3	2	2	3	2	4	2	4	3	3	5	3	0	6	6	6	6	6	6	5	3	1	4	3
31	2	1	1	1	4	5	2	4	2	3	2	4	3	4	1	4	2	5	1	4	4	4	3	4	1	3	2	1	5	1	4	2	4	2	4	2	2	5	4	5	1	4	1	6	4	1	1	5	5
37	4	5	3	3	5	1	5	4	6	1	4	3	0	4	1	5	3	1	3	1	5	4	0	5	5	5	5	4	4	5	0	6	0	3	4	4	3	1	2	5	0	5	2	4	4		0	6	4
38	5		3		5	4	2	6	5	1	4	3	2	4	4	3	3	3	2	2	4	4	4	4	4	4	3	3	3	3	2	4	2	4	4	4	2	2	2	4	2	3	2	2	4	3	2	2	4
39	5	5	2	3	5	4	2	6	5	2		3	4	4	1	5	3	6	2	2	4	5	2	4	5	4	4			3	1	2	1	1	4	6	1	1	2	6	2	5	2	5	4	1	1	5	5
40	4	4	2	4	1	2	4	4	6	2	2	2	4	2	4	4	3	4	2	2	4	4	4	2	2	4	2	2	3	4	4	2	3	2	2	5	2	4	2	4	1	4	1	5	1	3	3	5	5
41	5	5	3	3	6	2		4	5	2		1	2	5	5	6	2	6	2	2	6	5	1	4	3	6	5	1	3	4	1	5	4	4	5	4	5	2	4	5	1	6	1	4	6	1	2	6	5
42	6	4	4	3	4	5	5	5	4	2	1	4	3	6	3	2	3	5	3	1	2	3	4	1	2	2	1	2	5	3	4	3	2	2	3	6	3	2	1	5	0	4	1	5	2	1	0	6	1
43	2	6	3	3	2	6	5	5	6	0	4	2	1	5	1	6	3	2		2	6	6	2	4	2	4	3	1	4	3	3	4	1	3	6	5	3	3	5	5	3	5	1	2	4	1	1	5	5
46	4	5	2	3	4	4	4	5	4	0		2	4	3	2	4		4		2	4	4	1	4	4	4	4	4	3	4	5	5	1	3	2	4	3	1	2	4	1	4	3	3	2	4	3	4	4
47	3	4	3	3	3	4	3	4	5	5	4	4	2	1	4	0	3	0	3	2	2	4	3	3	3	2	2	1	4	2	4	4	4	4	5	6	2	0	0	3	6	0	4	6	0	6	6	6	0
48	5	5	2	3	4	4	2	6	4	2	4	1	1	4	2	5	2	4	2	2	4	4	1	5	4	3	4	2	3	3	1	5	2	2	2	4	1	1	0	4	1	4	4	2	5	2	1	2	5
51	6	5	3	3	5	4	4	4	6	1	3	4	4	5	1	5	3	5	3	1	5	5	1	5	6	4	5	1	5	5	0	5	1	5	5	2	1	4	3	4	2	4	1	5	4	0	0	6	5
52	5	5	3	3	5	4	4	4	4	4	4	3	2	2	2	4	3	5	3	3	4	4	2	4	5	4	3	5	3	3	1	5	1	4	4	5	4	1	2	4	2	2	1	5	2	1	1	4	5
53	5	3	1	5	4	1	4	4	1	4	4	5	3	3	2	0	3	6	3	0	4	1	1	1	2	0	2	4	4	5	2	1	1	0	0	6	6	5	0	2	6		1	2	3	6	5	5	1
54	4	4	2	2	5	5	4	5	4	5	4	2	2	4	1	4	3	2	2	2	4	4	2	4	5	5	4	2	2	4	5	5	2	2	2	5	4	0	2	4	2	2	2	6	2	1	0	2	6
55	6	3	3	3	4	5	2	5	6	4	3	0	0	6	0	4	3	6	1	4	5	5	1	6	2	5	4	0	3	5	5	4	0	2	5	6	3	1	4	6	0	6	4	6	1	0	6	4	4
56	5	6	3	3	6	5	4	4	3	1	3	3	2	4	2	5	3	2	3	3	5	6	1	5	5	4	3	5	3	4	0	6	1	5	6	4	3	3	5	4	4	5	4	3	3	0	0	2	5
[truncated: 951 more columns]
